# Supplementary material
Source: publisher figshare collection journal article supplement (https://acs.figshare.com/ndownloader/files/4587682)

## Sesquiterpenoids and Phenylpropanoids from *Chloranthus serratus*

Tao Yuan, Chuan-Rui Zhang, Sheng-Ping Yang, Sheng Yin, Wen-Bin Wu, Lei Dong

and Jian-Min Yue

*State Key Laboratory of Drug Research, Shanghai Institute of Materia Medica, Shanghai*

*Institutes for Biological Sciences, Chinese Academy of Sciences, 555 Zu Chong Zhi Road,*

*Zhangjiang Hi-Tech Park, Shanghai, 201203, People's Republic of China*

### Supporting Information Available

Figure S1. Selected HMBC and ROESY correlations of **1–9**

For Compound **1**

Figure S2.  $^1\text{H}$  NMR spectrum of Chlorantene **A** (**1**) in  $\text{CDCl}_3$

Figure S3.  $^{13}\text{C}$  NMR spectrum of Chlorantene **A** (**1**) in  $\text{CDCl}_3$

Figure S4. HSQC spectrum of Chlorantene **A** (**1**) in  $\text{CDCl}_3$

For Compound **2**

Figure S5.  $^1\text{H}$  NMR spectrum of Chlorantene **B** (**2**) in  $\text{CDCl}_3$

Figure S6.  $^{13}\text{C}$  NMR spectrum of Chlorantene **B** (**2**) in  $\text{CDCl}_3$

Figure S7. HSQC spectrum of Chlorantene **B** (**2**) in  $\text{CDCl}_3$

For Compound **3a**

Figure S8.  $^1\text{H}$  NMR spectrum of Compound **3a** in  $\text{CDCl}_3$

Figure S9.  $^1\text{H}$  NMR spectrum of Compound **3a** in  $\text{DMSO}-d_6$

Figure S10.  $^{13}\text{C}$  NMR spectrum of Compound **3a** in  $\text{CDCl}_3$

Figure S11.  $^{13}\text{C}$  NMR spectrum of Compound **3a** in  $\text{DMSO-}d_6$

Figure S12. HSQC spectrum of Compound **3a** in  $\text{CDCl}_3$

For Compound **3**

Figure S13.  $^1\text{H}$  NMR spectrum of Chlorantene **C** (**3**) in  $\text{CDCl}_3$

Figure S14.  $^1\text{H}$  NMR spectrum of Chlorantene **C** (**3**) in  $\text{DMSO-}d_6$

Figure S15.  $^{13}\text{C}$  NMR spectrum of Chlorantene **C** (**3**) in  $\text{CDCl}_3$

Figure S16.  $^{13}\text{C}$  NMR spectrum of Chlorantene **C** (**3**) in  $\text{DMSO-}d_6$

Figure S17. HSQC spectrum of Chlorantene **C** (**3**) in  $\text{CDCl}_3$

For Compound **4**

Figure S18.  $^1\text{H}$  NMR spectrum of Chlorantene **D** (**4**) in  $\text{CD}_3\text{COCD}_3$

Figure S19.  $^{13}\text{C}$  NMR spectrum of Chlorantene **D** (**4**) in  $\text{CD}_3\text{COCD}_3$

Figure S20. HSQC spectrum of Chlorantene **D** (**4**) in  $\text{CD}_3\text{COCD}_3$

For Compound **5**

Figure S21.  $^1\text{H}$  NMR spectrum of Chlorantene **E** (**5**) in  $\text{CDCl}_3$

Figure S22.  $^{13}\text{C}$  NMR spectrum of Chlorantene **E** (**5**) in  $\text{CDCl}_3$

For Compound **6**

Figure S23.  $^1\text{H}$  NMR spectrum of Chlorantene **F** (**6**) in  $\text{CDCl}_3$

Figure S24.  $^{13}\text{C}$  NMR spectrum of Chlorantene **F** (**6**) in  $\text{CDCl}_3$

For Compound **7**

Figure S25.  $^1\text{H}$  NMR spectrum of Chlorantene **G** (**7**) in  $\text{CDCl}_3$

Figure S26.  $^{13}\text{C}$  NMR spectrum of Chlorantene **G** (**7**) in  $\text{CDCl}_3$

Figure S27. HSQC spectrum of Chlorantene **G** (**7**) in  $\text{CDCl}_3$

For Compound **8** and **9**

Figure S28.  $^1\text{H}$  NMR spectrum of compound **8** in  $\text{CDCl}_3$

Figure S29.  $^1\text{H}$  NMR spectrum of compound **9** in  $\text{CDCl}_3$

Figure S30.  $^{13}\text{C}$  NMR spectrum of compound **8** in  $\text{CDCl}_3$

Figure S31.  $^{13}\text{C}$  NMR spectrum of compound **9** in  $\text{CDCl}_3$

**Figure S1. Selected HMBC and ROESY correlations of 1–9**

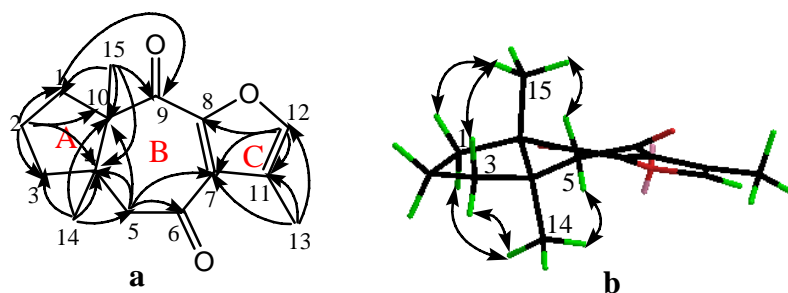

**Figure 1. Selected HMBC (H→C) (a) and ROESY (↔) (b) correlations of chlorantene A (1)**

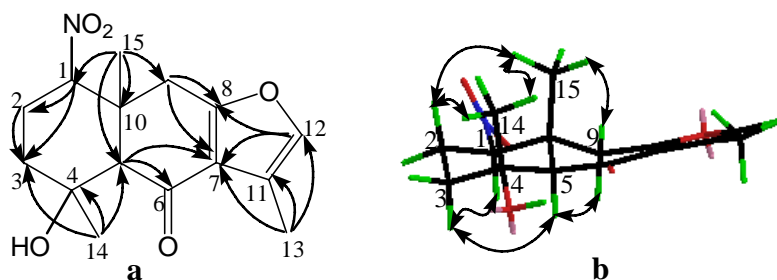

**Figure 2. Selected HMBC (H→C) (a) and ROESY (↔) (b) correlations of chlorantene B (2)**

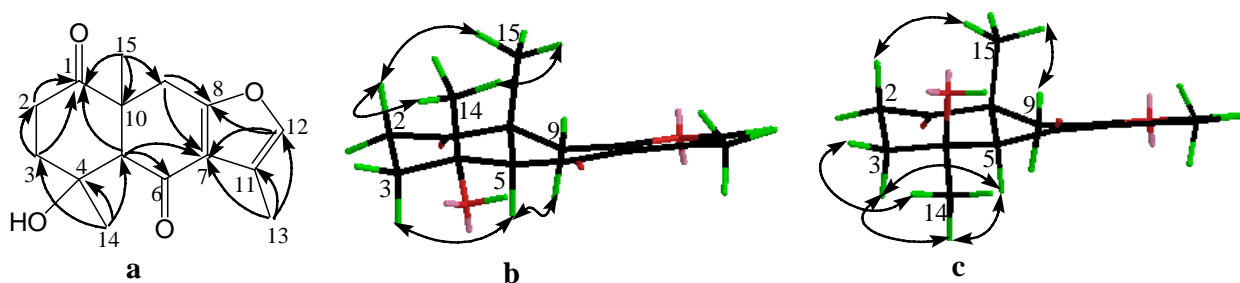

**Figure 3. Selected HMBC (H→C) of compounds 3 and 3a (a); Selected ROESY (↔) correlations of 3a (b) and 3 (c)**

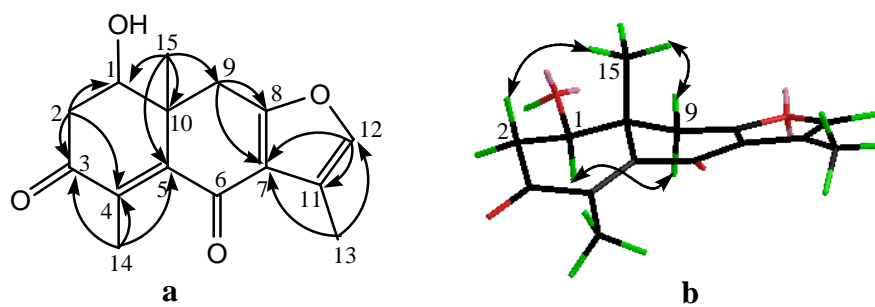

**Figure 4.** Selected HMBC (H→C) (a) and ROESY (↔) (b) correlations of chlorantene D (4)

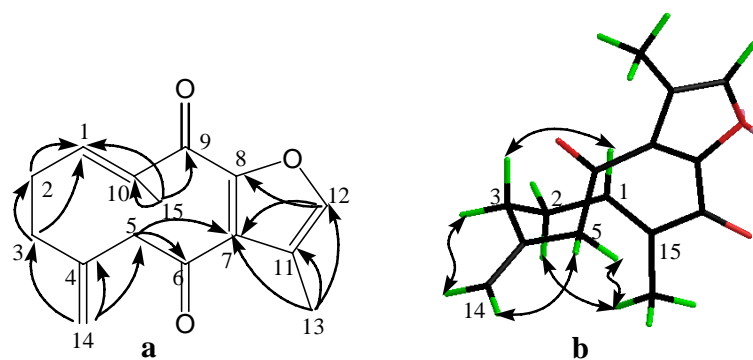

**Figure 5.** Selected HMBC (H→C) (a) and ROESY (↔) (b) correlations of chlorantene E (5)

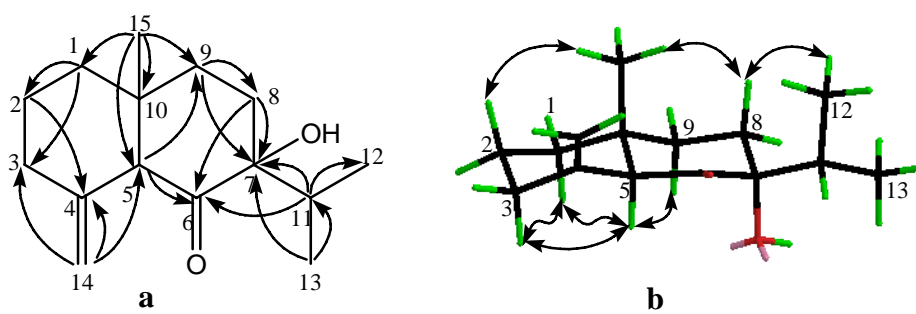

**Figure 6.** Selected HMBC (H→C) (a) and ROESY (↔) (b) correlations of chlorantene G (7)

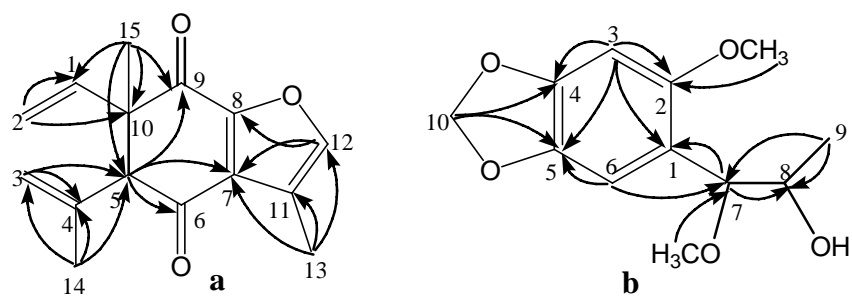

**Figure 7.** Selected HMBC (H→C) correlations of chlorantene F (**6**) (**a**) and compounds **8** and **9** (**b**)

Figure S2.  $^1\text{H}$  NMR spectrum of Chlorantene A (1) in  $\text{CDCl}_3$

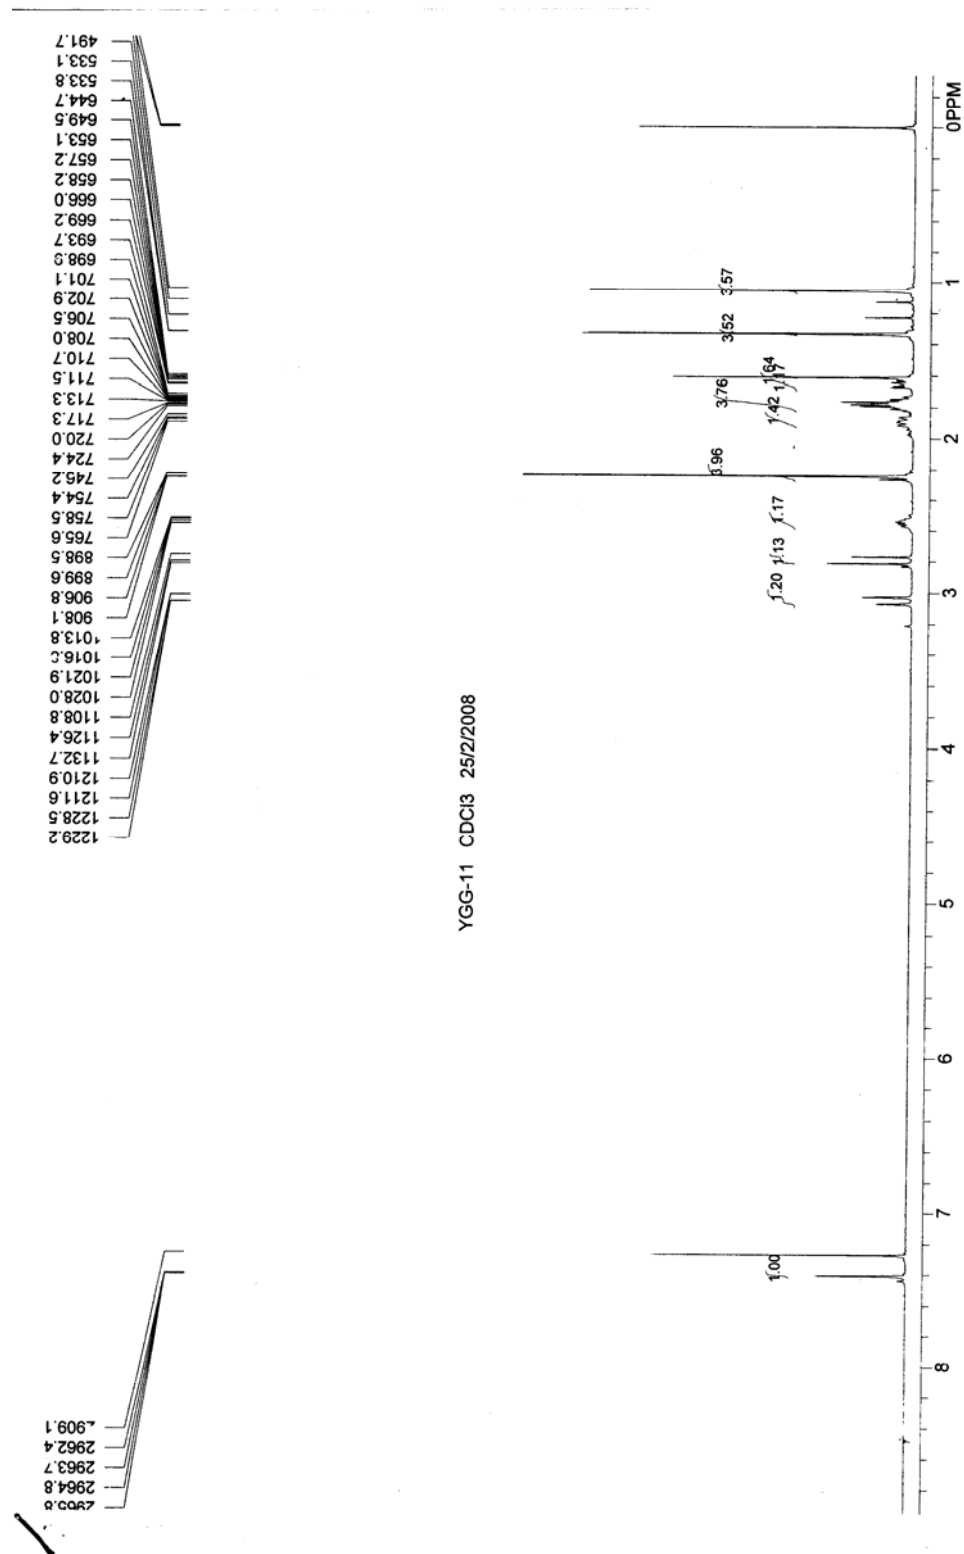

Figure S3.  $^{13}\text{C}$  NMR spectrum of Chlorantene A (**1**) in  $\text{CDCl}_3$

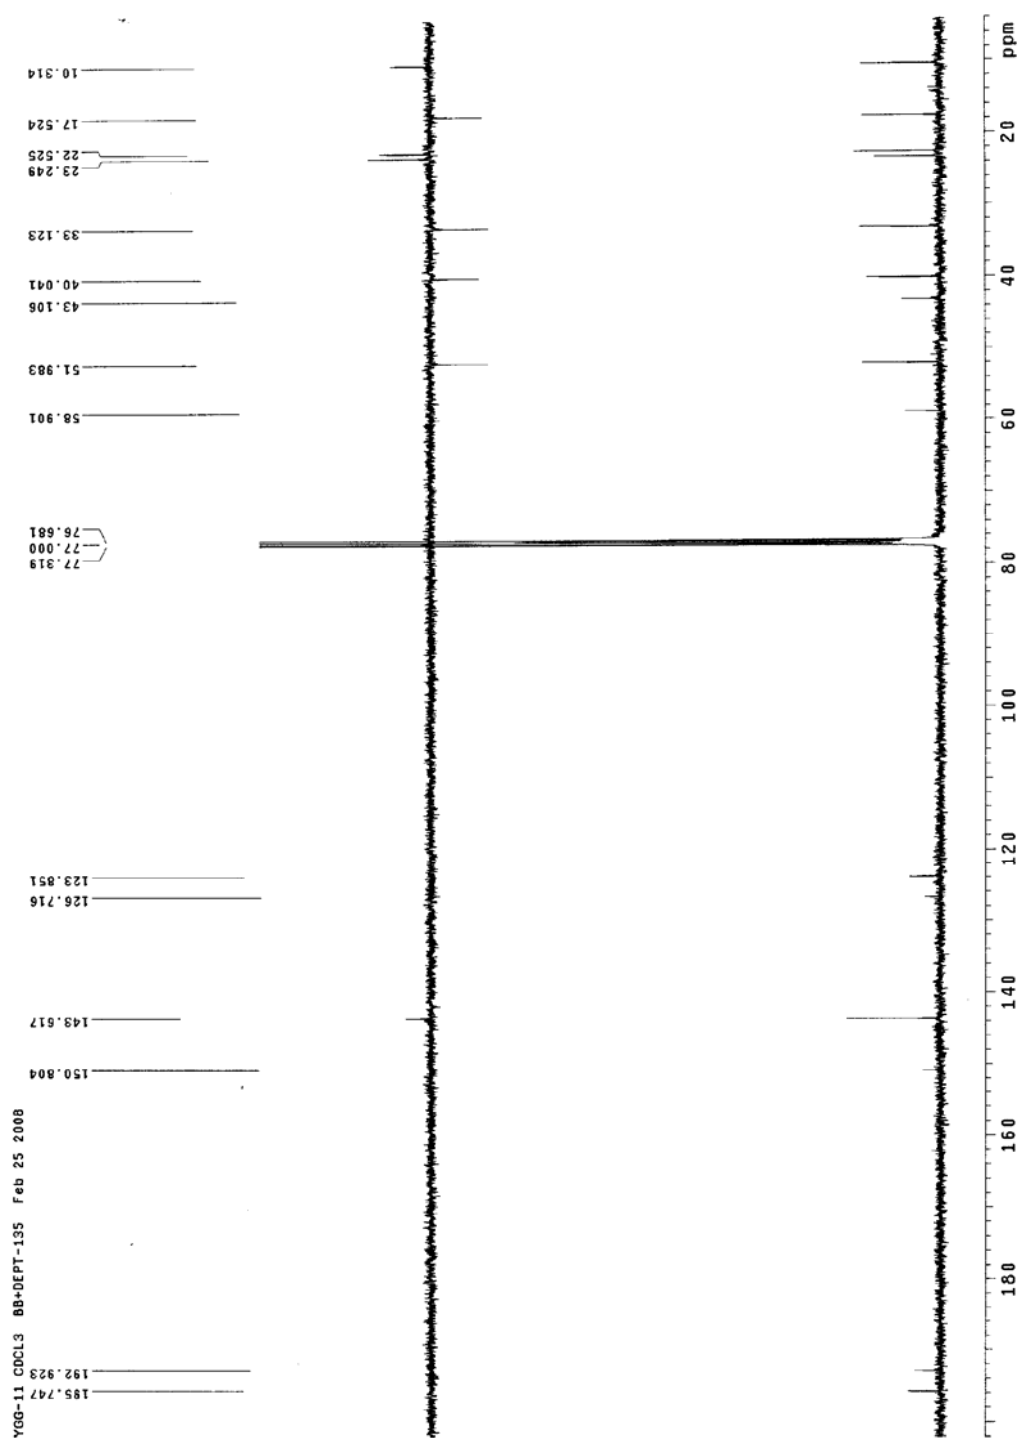



Figure S4. HSQC spectrum of Chlorantene A (**1**) in CDCl<sub>3</sub>

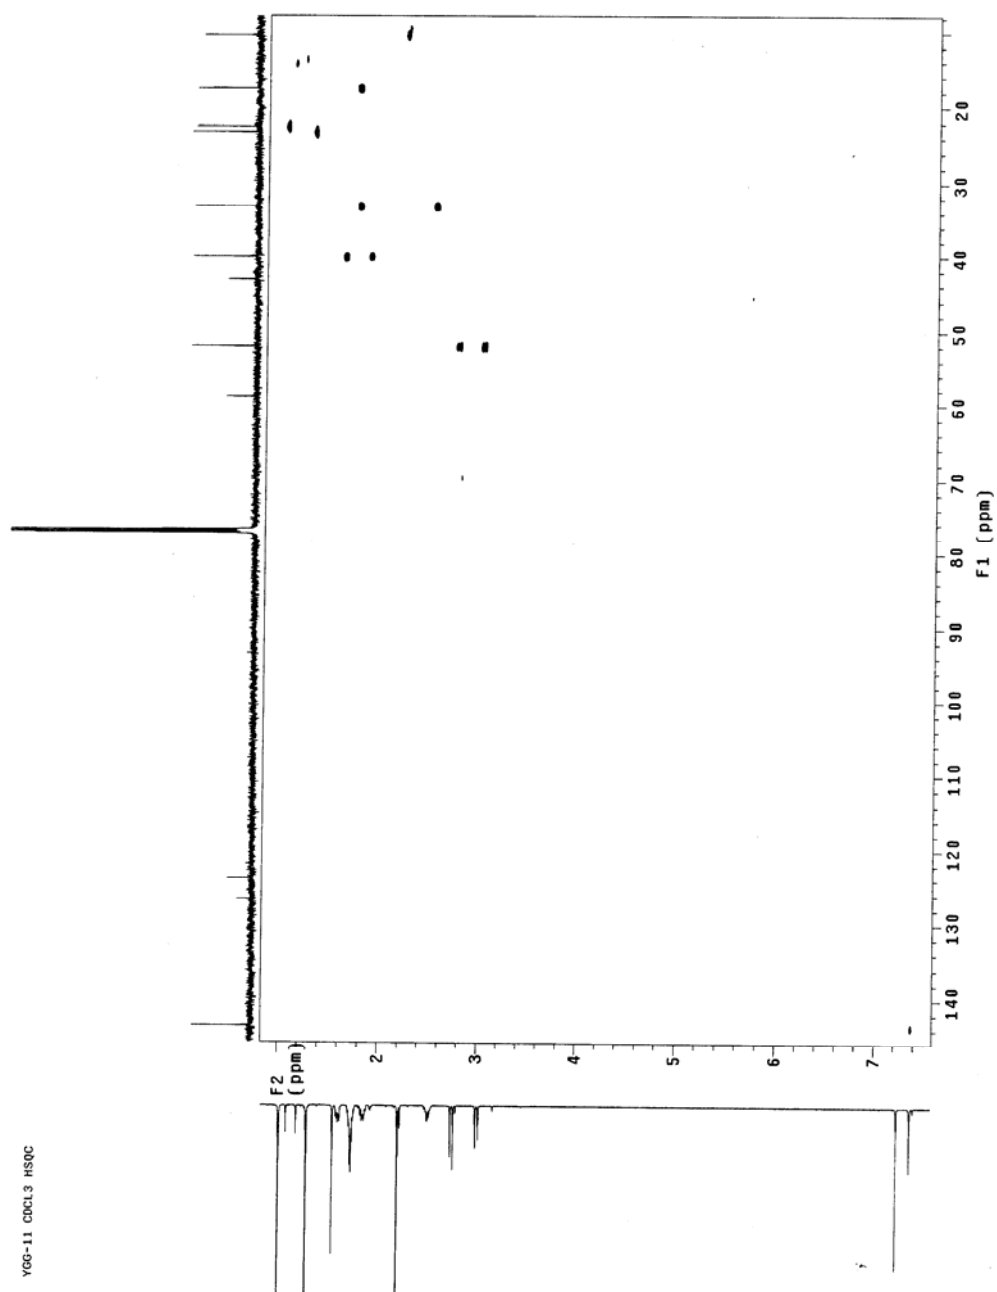

Figure S5.  $^1\text{H}$  NMR spectrum of Chlorantene **B** (2) in  $\text{CDCl}_3$

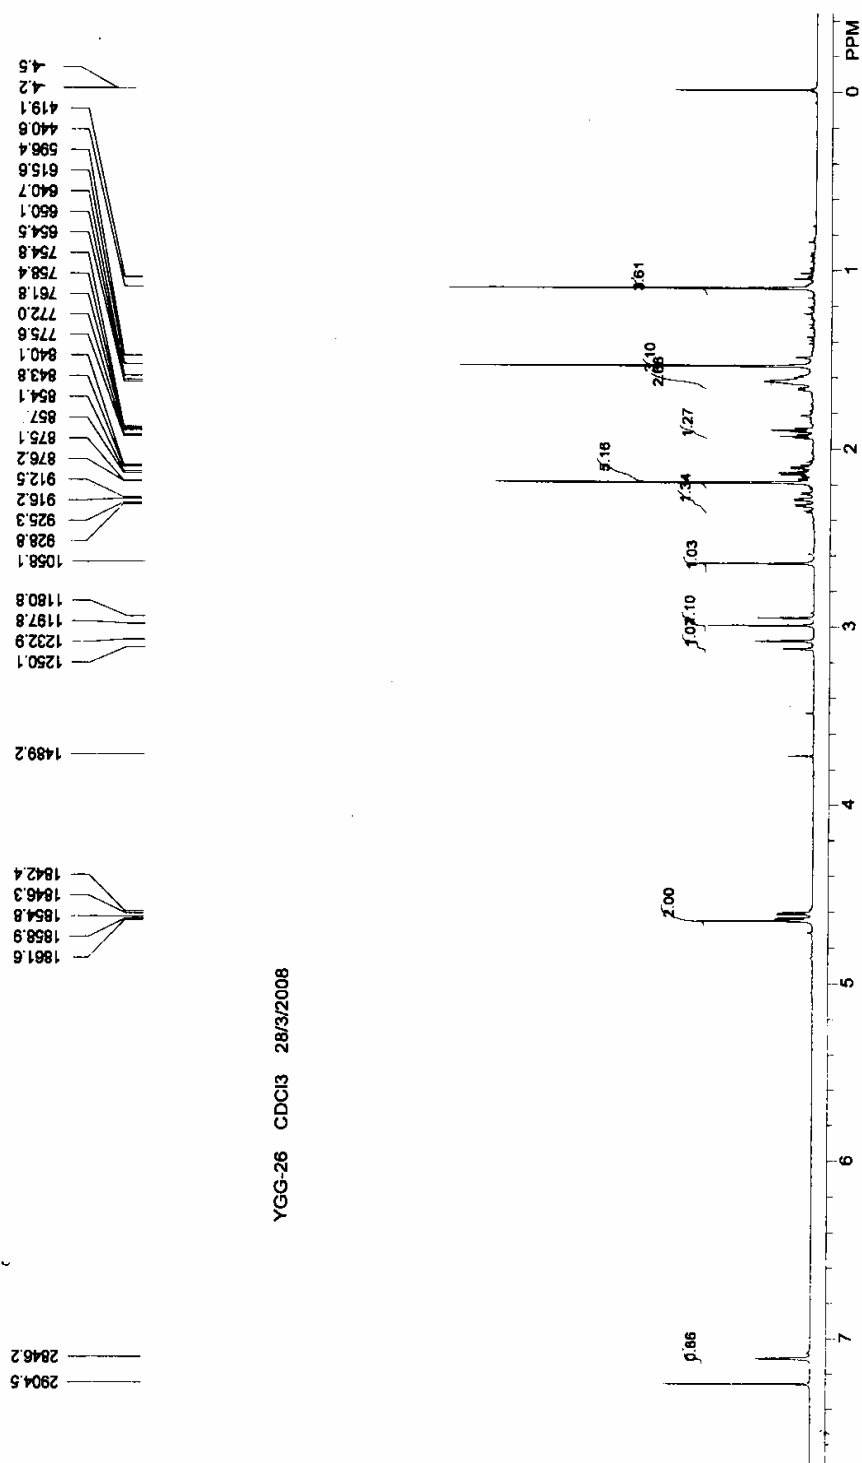

Figure S6.  $^{13}\text{C}$  NMR spectrum of Chlorantene **B** (2) in  $\text{CDCl}_3$

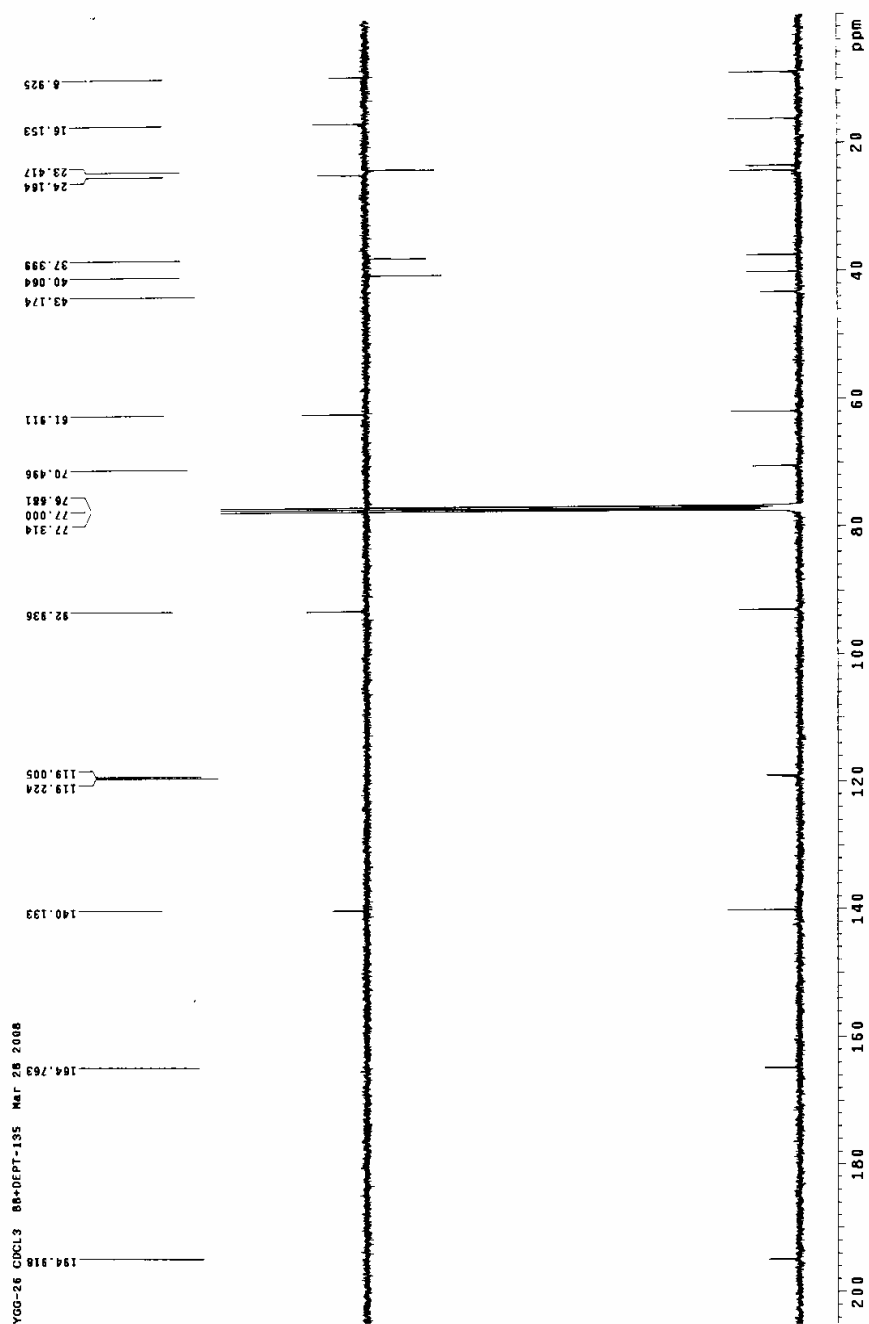

Figure S7. HSQC spectrum of Chlorantene **B** (2) in CDCl<sub>3</sub>

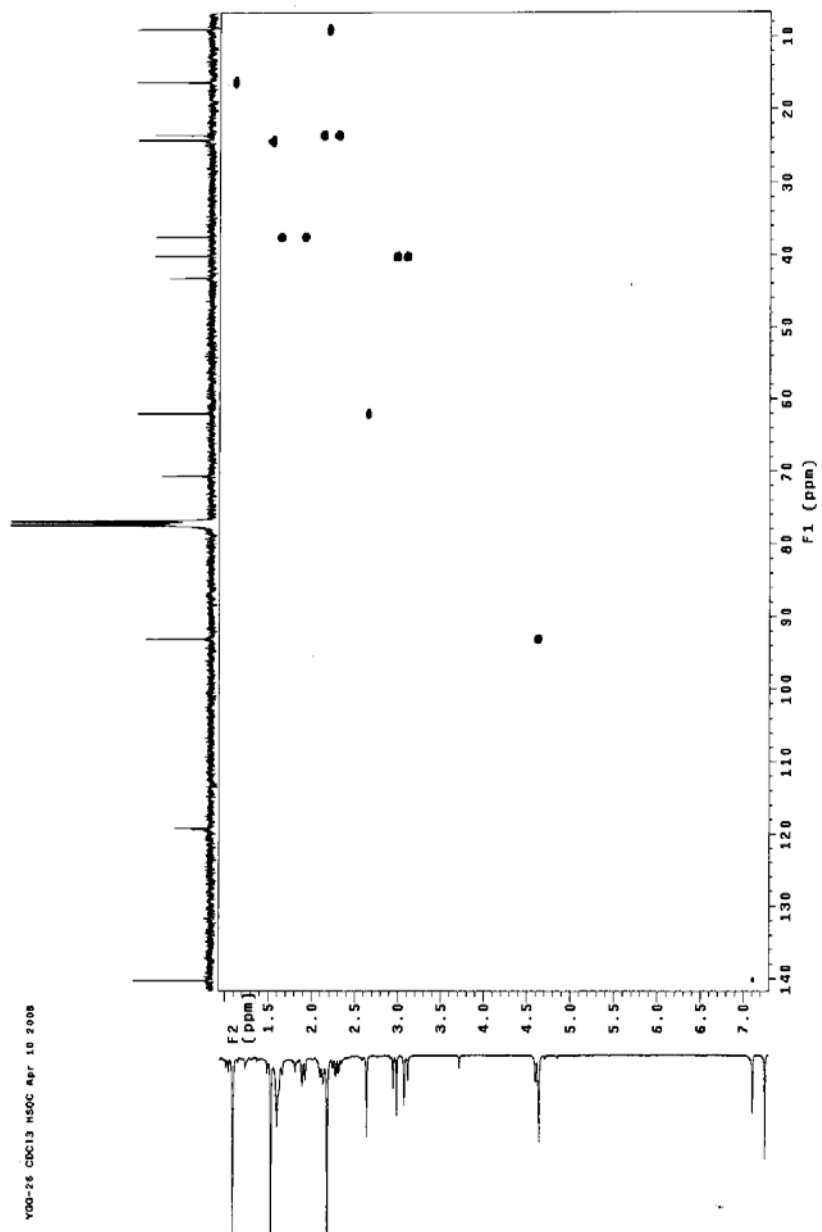

Figure S8.  $^1\text{H}$  NMR spectrum of Compound **3a** in  $\text{CDCl}_3$

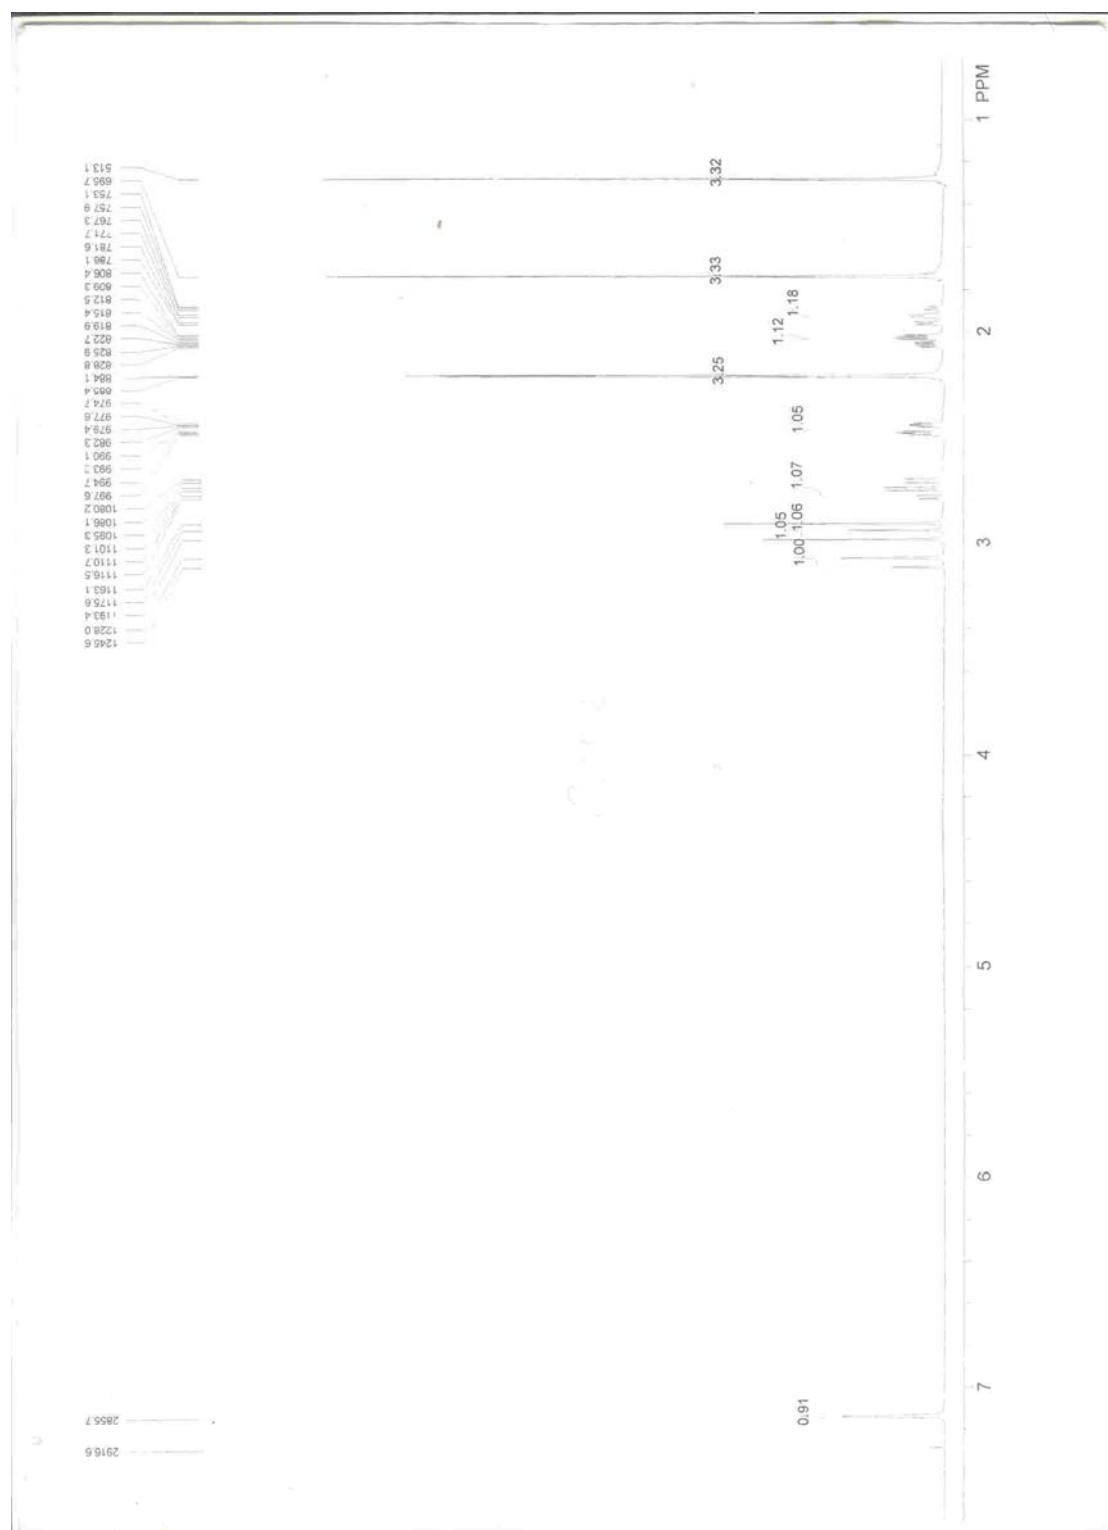

Figure S9.  $^1\text{H}$  NMR spectrum of Compound **3a** in  $\text{DMSO}-d_6$

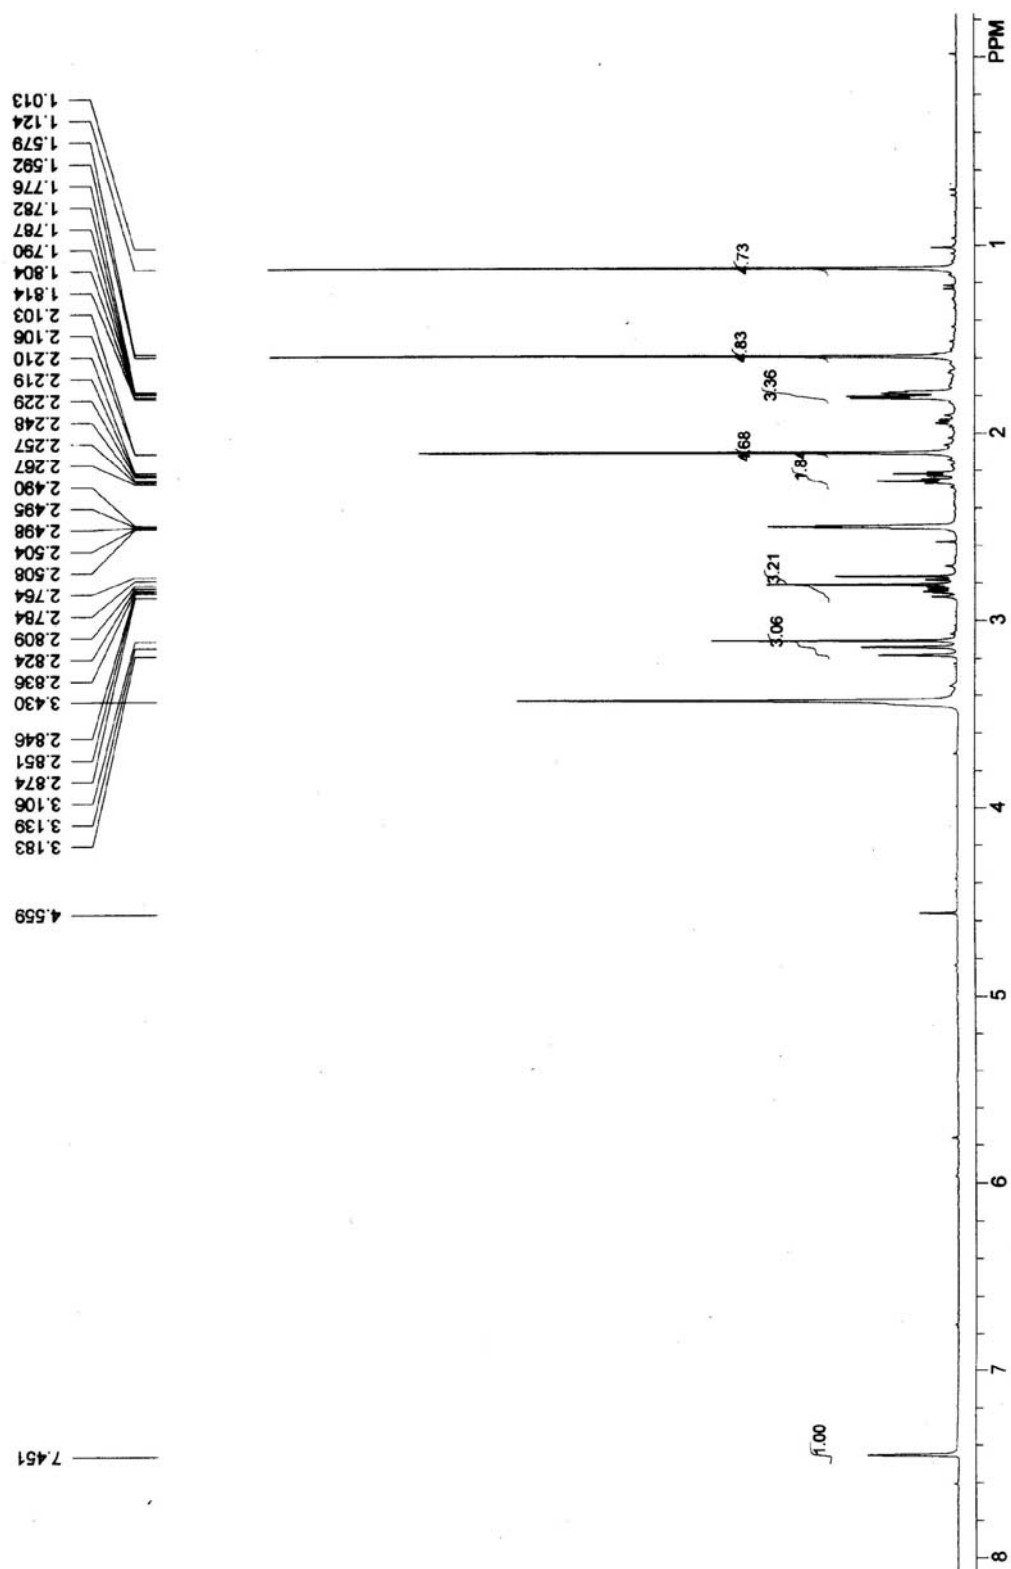

Figure S10.  $^{13}\text{C}$  NMR spectrum of Compound **3a** in  $\text{CDCl}_3$

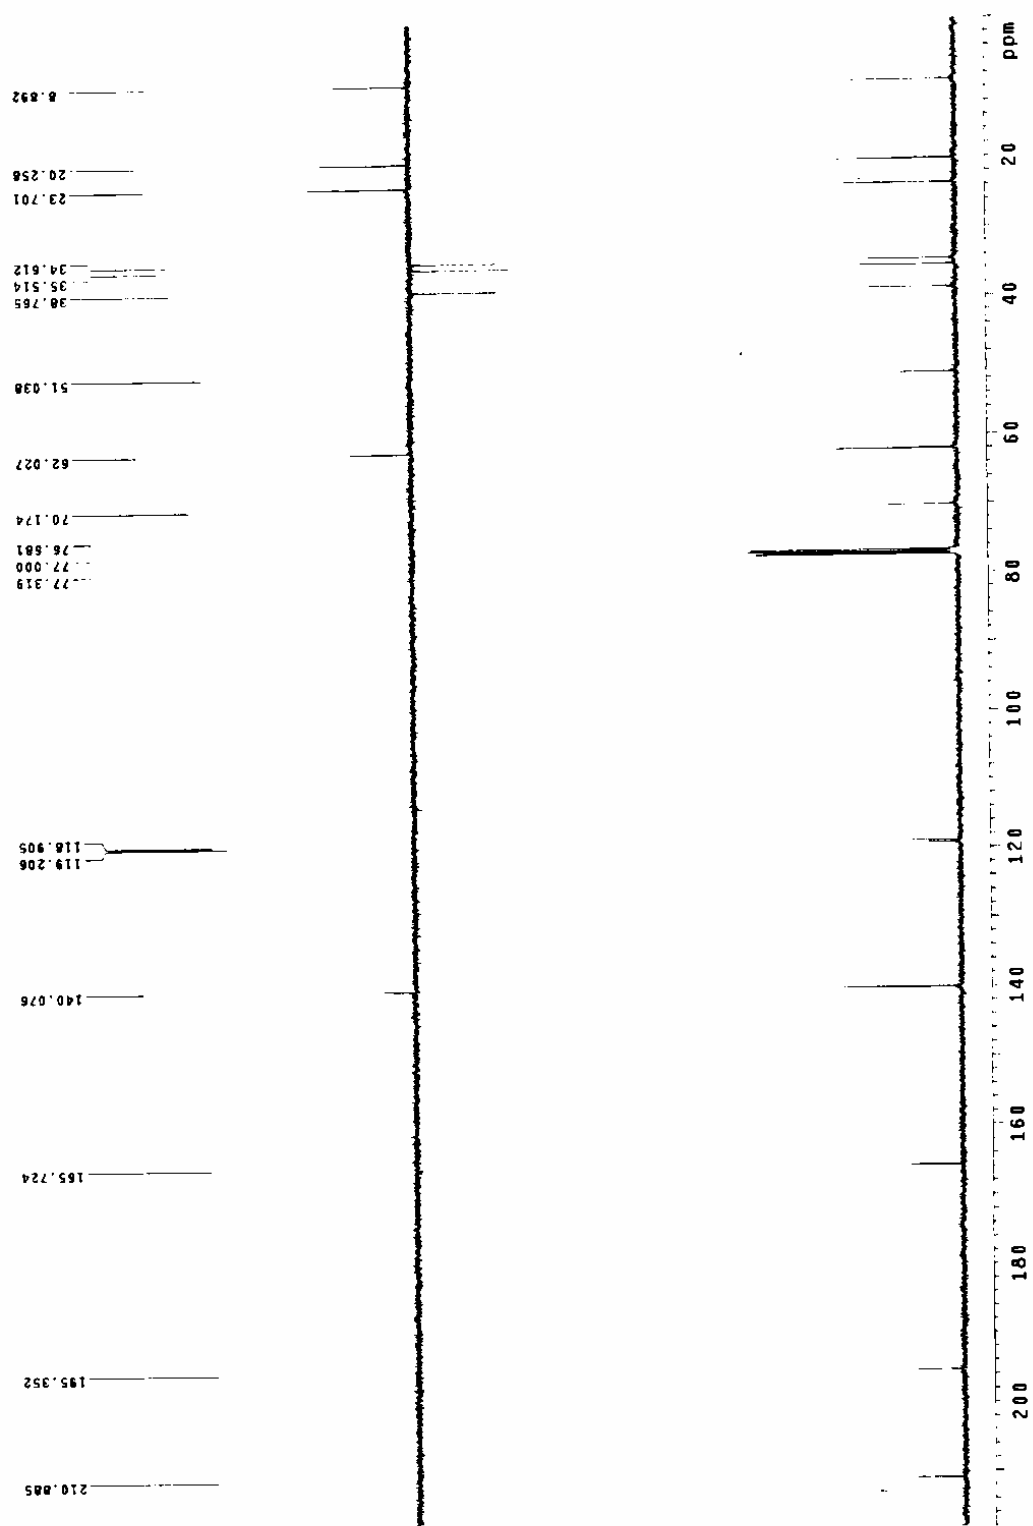

Figure S11.  $^{13}\text{C}$  NMR spectrum of Compound **3a** in  $\text{DMSO}-d_6$

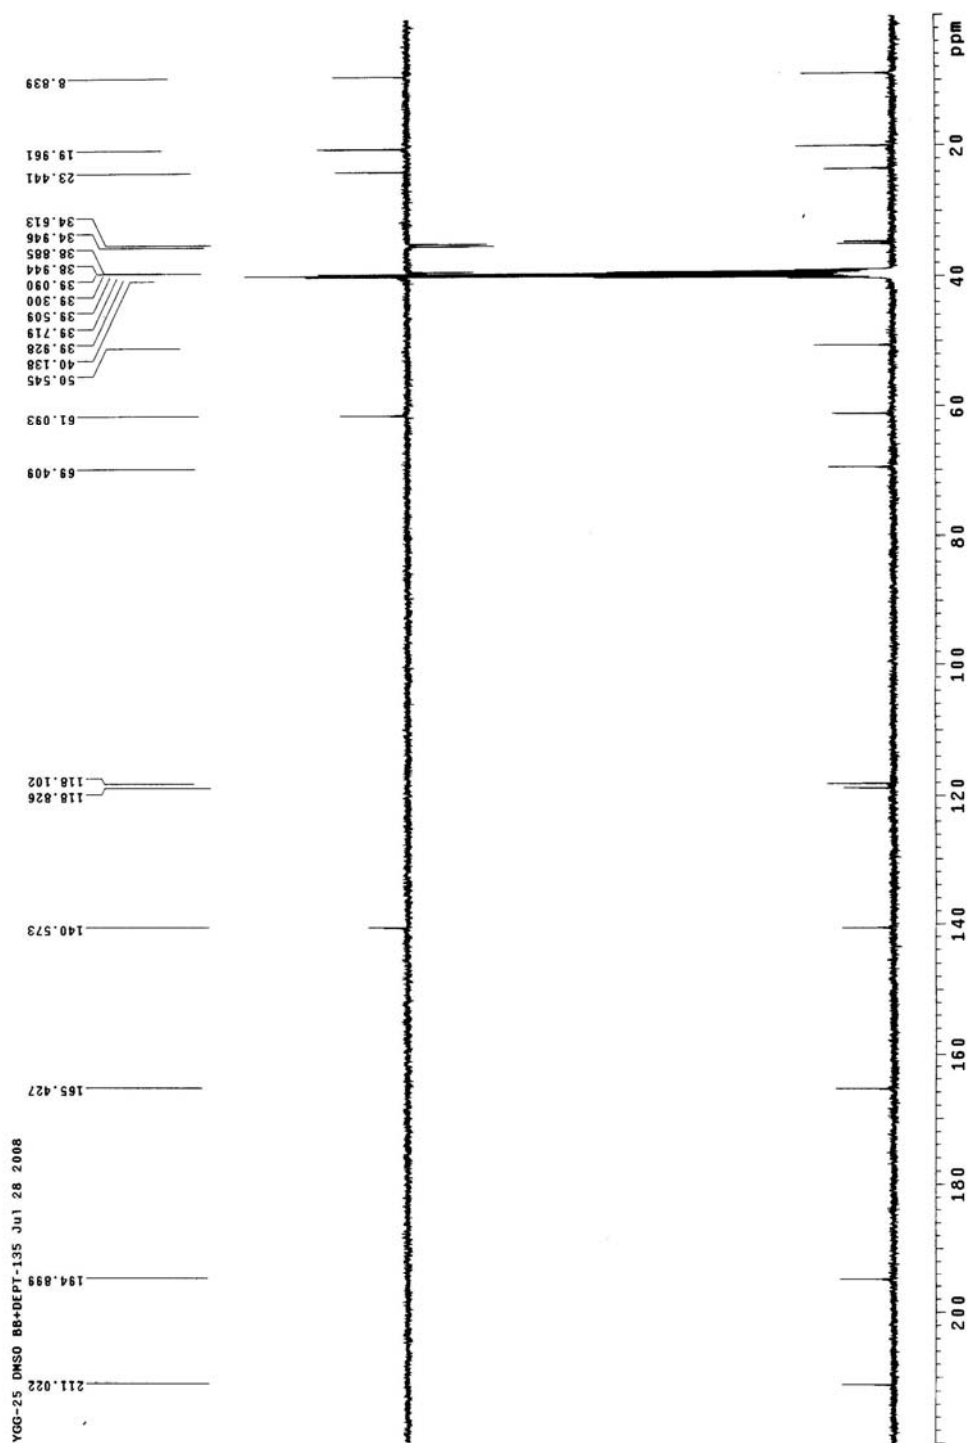



Figure S12. HSQC spectrum of Compound **3a** in CDCl<sub>3</sub>

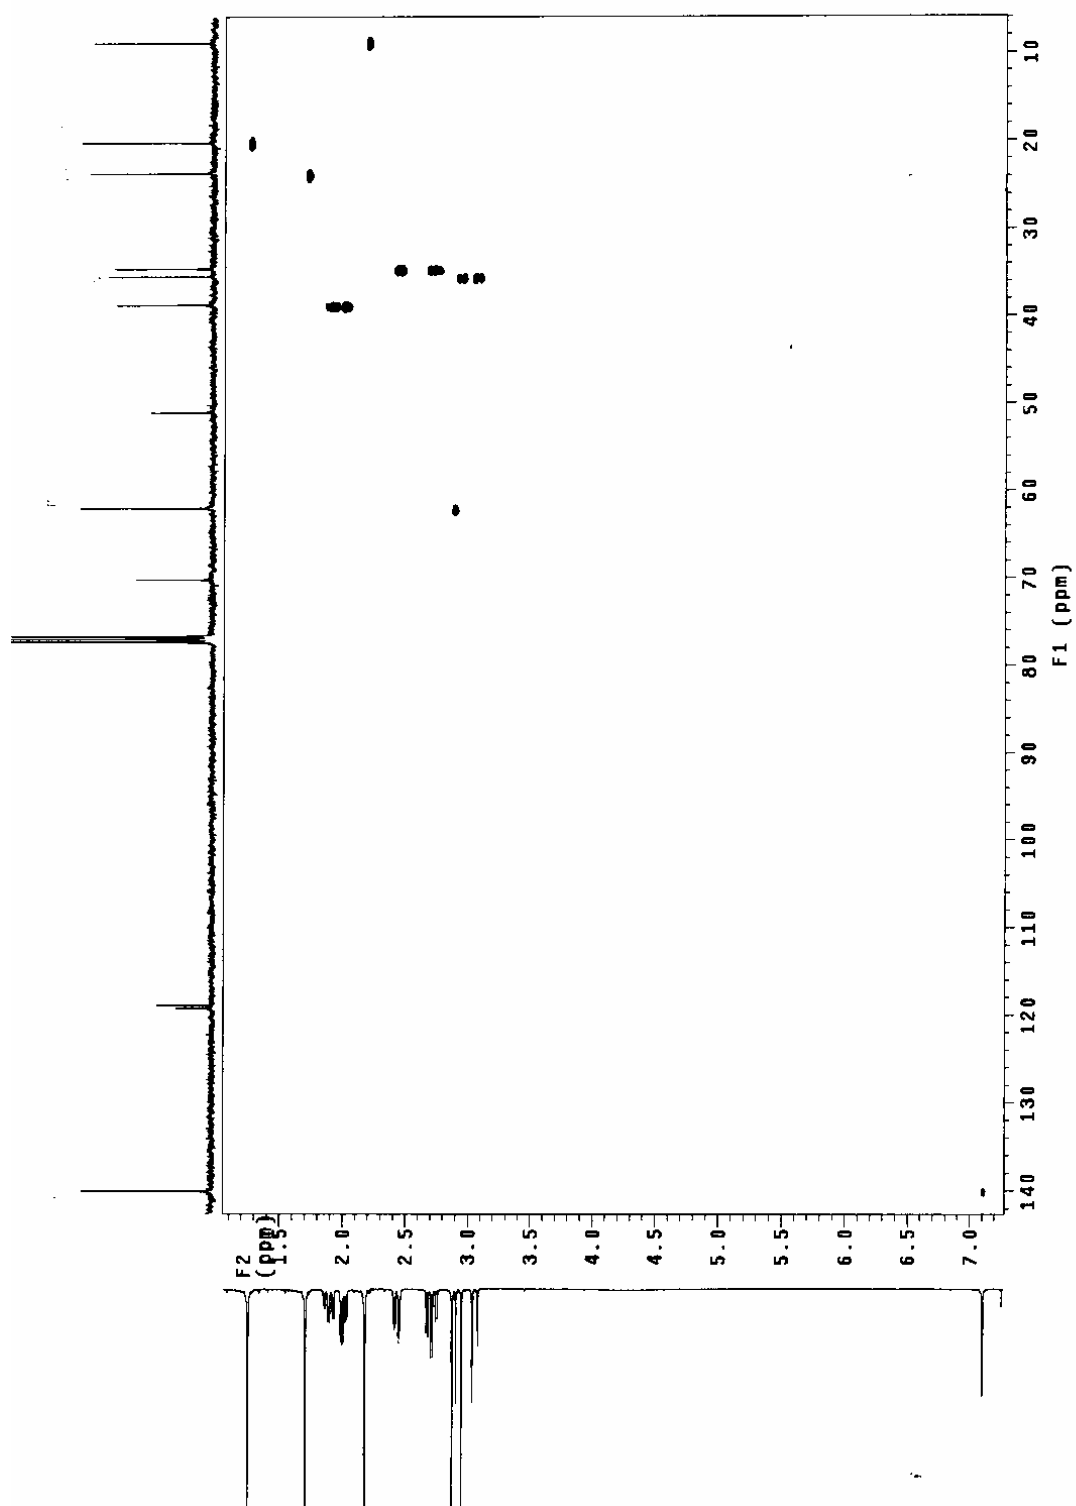

YGG-6 CDC13 14/12/2008

Chemical shifts (ppm): 1267.3, 1253.6, 1249.3, 1440.2, 1239.2, 1233.7, 1225.1, 1219.6, 1116.5, 1114.0, 1098.6, 890.7, 886.0, 883.3, 876.6, 873.4, 869.5, 863.1, 862.1, 854.7, 849.4, 846.1, 843.7, 840.5, 714.1, 710.3, 700.0, 696.0, 685.5, 681.7, 600.8, 584.4, 555.0, 528.3, -13.6.

Integrations: 1.00 (2837.1 ppm), 2.41 (2904.7 ppm), 2.41 (109.8 ppm), 6.73 (87.3 ppm), 3.48 (75.5 ppm), 1.41 (41.1 ppm).

YGG-6 CDC13 14/1/2008

2904.7  
2837 1

Figure S14.  $^1\text{H}$  NMR spectrum of Chlorantene **C** (**3**) in  $\text{DMSO}-d_6$

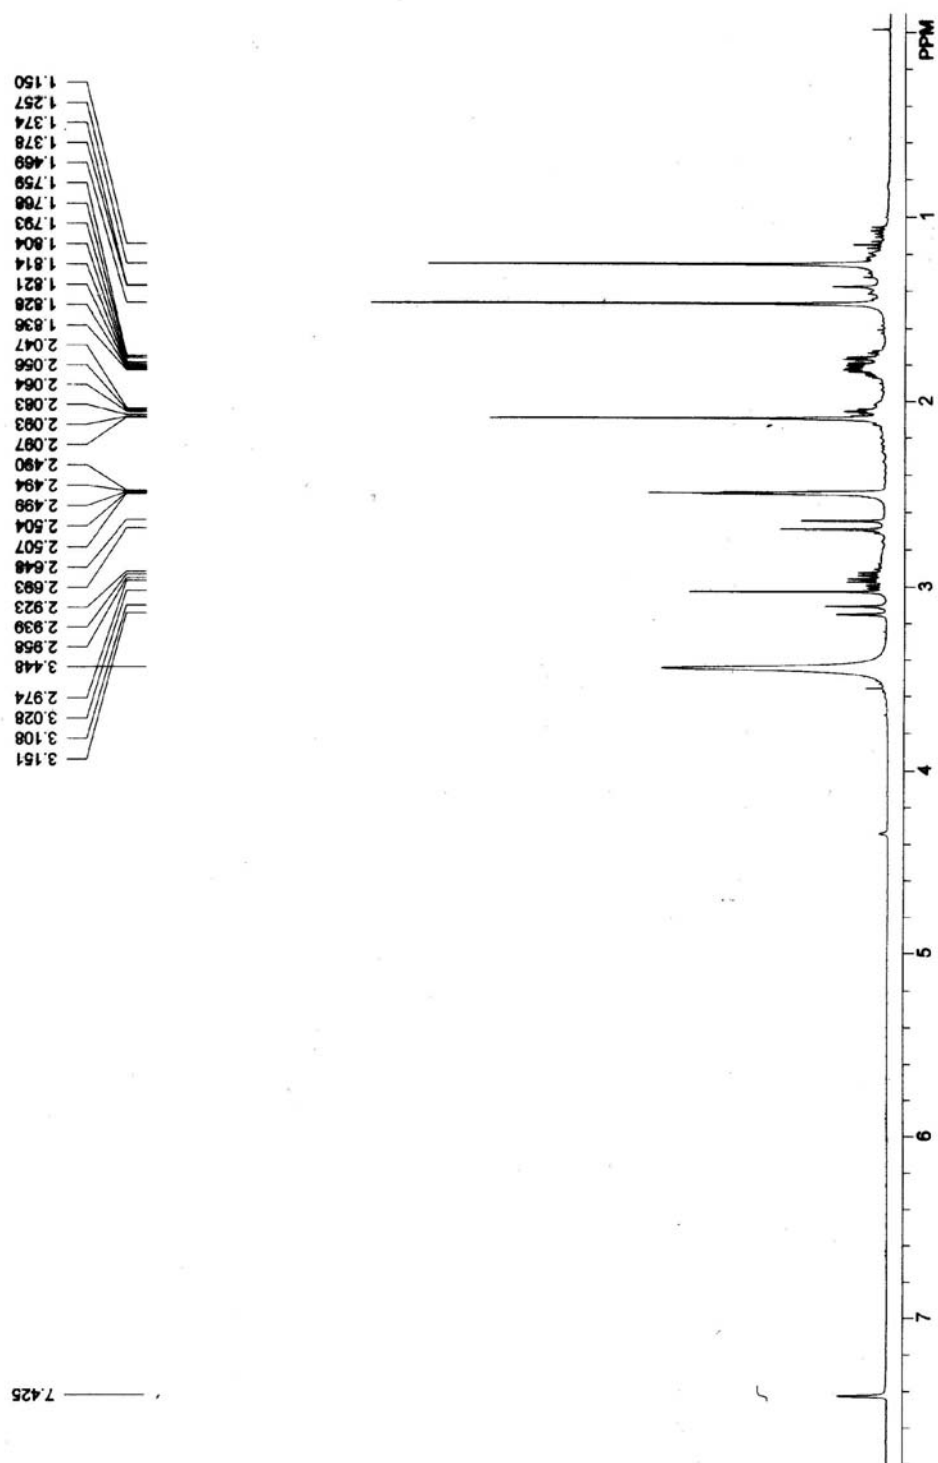

Figure S15.  $^{13}\text{C}$  NMR spectrum of Chlorantene **C** (**3**) in  $\text{CDCl}_3$

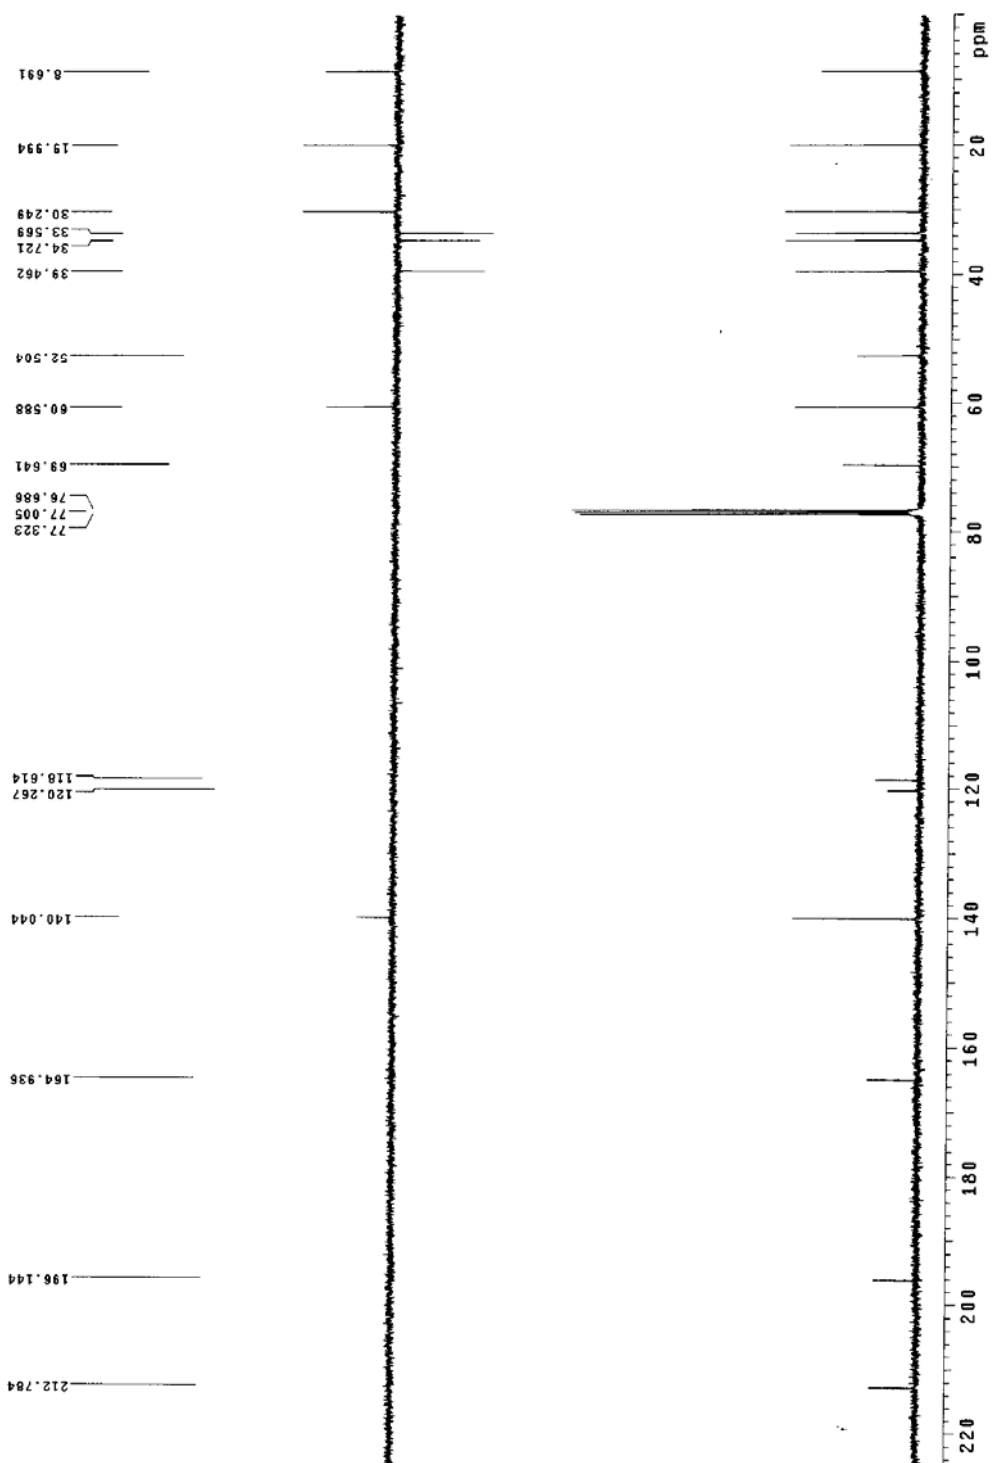

Figure S16.  $^{13}\text{C}$  NMR spectrum of Chlorantene **C** (**3**) in  $\text{DMSO}-d_6$

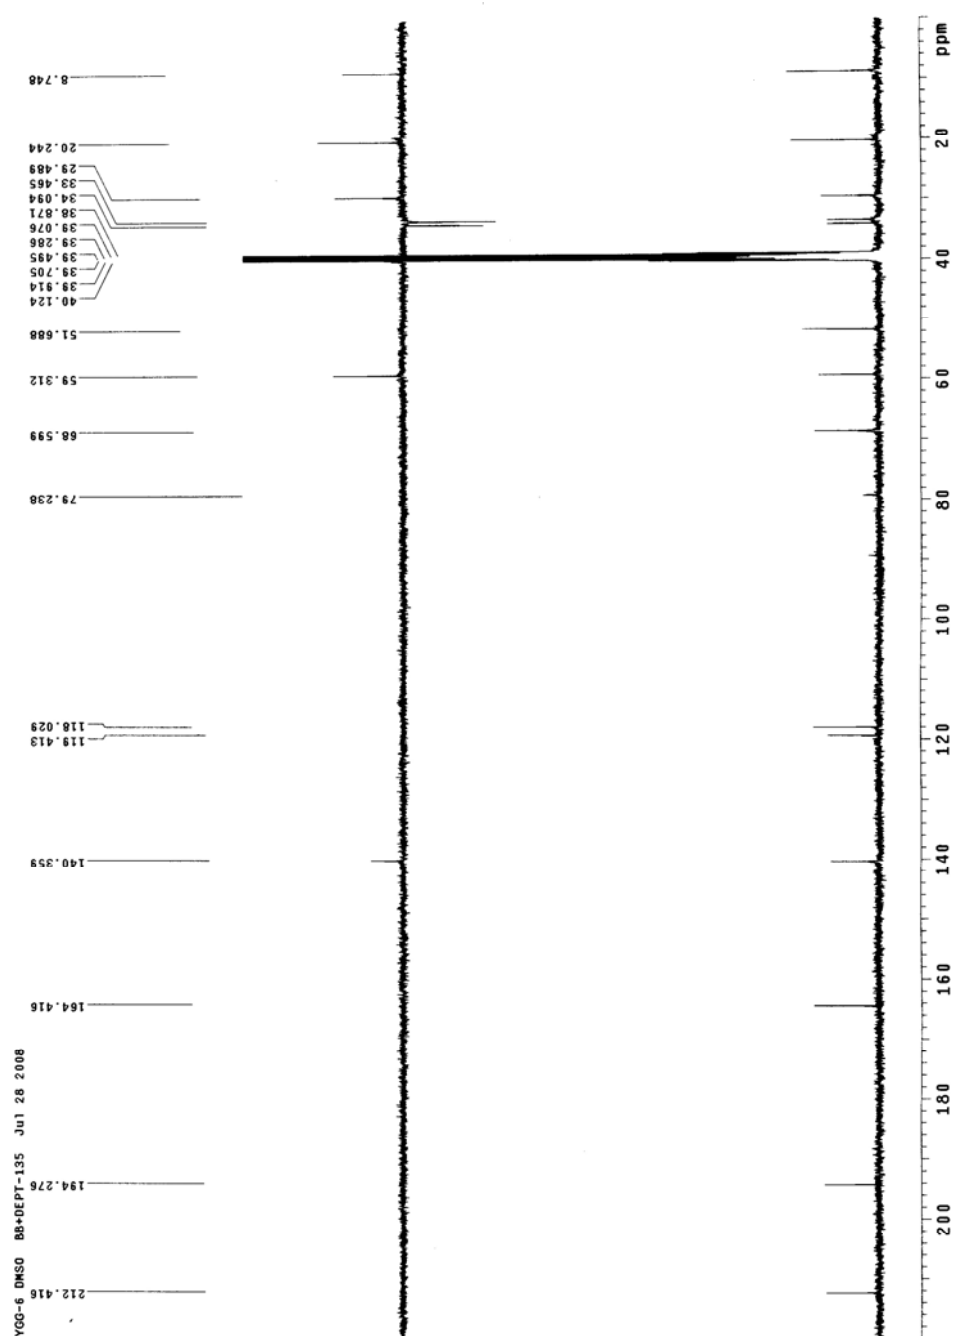

Figure S17. HSQC spectrum of Chlorantene **C** (**3**) in CDCl<sub>3</sub>

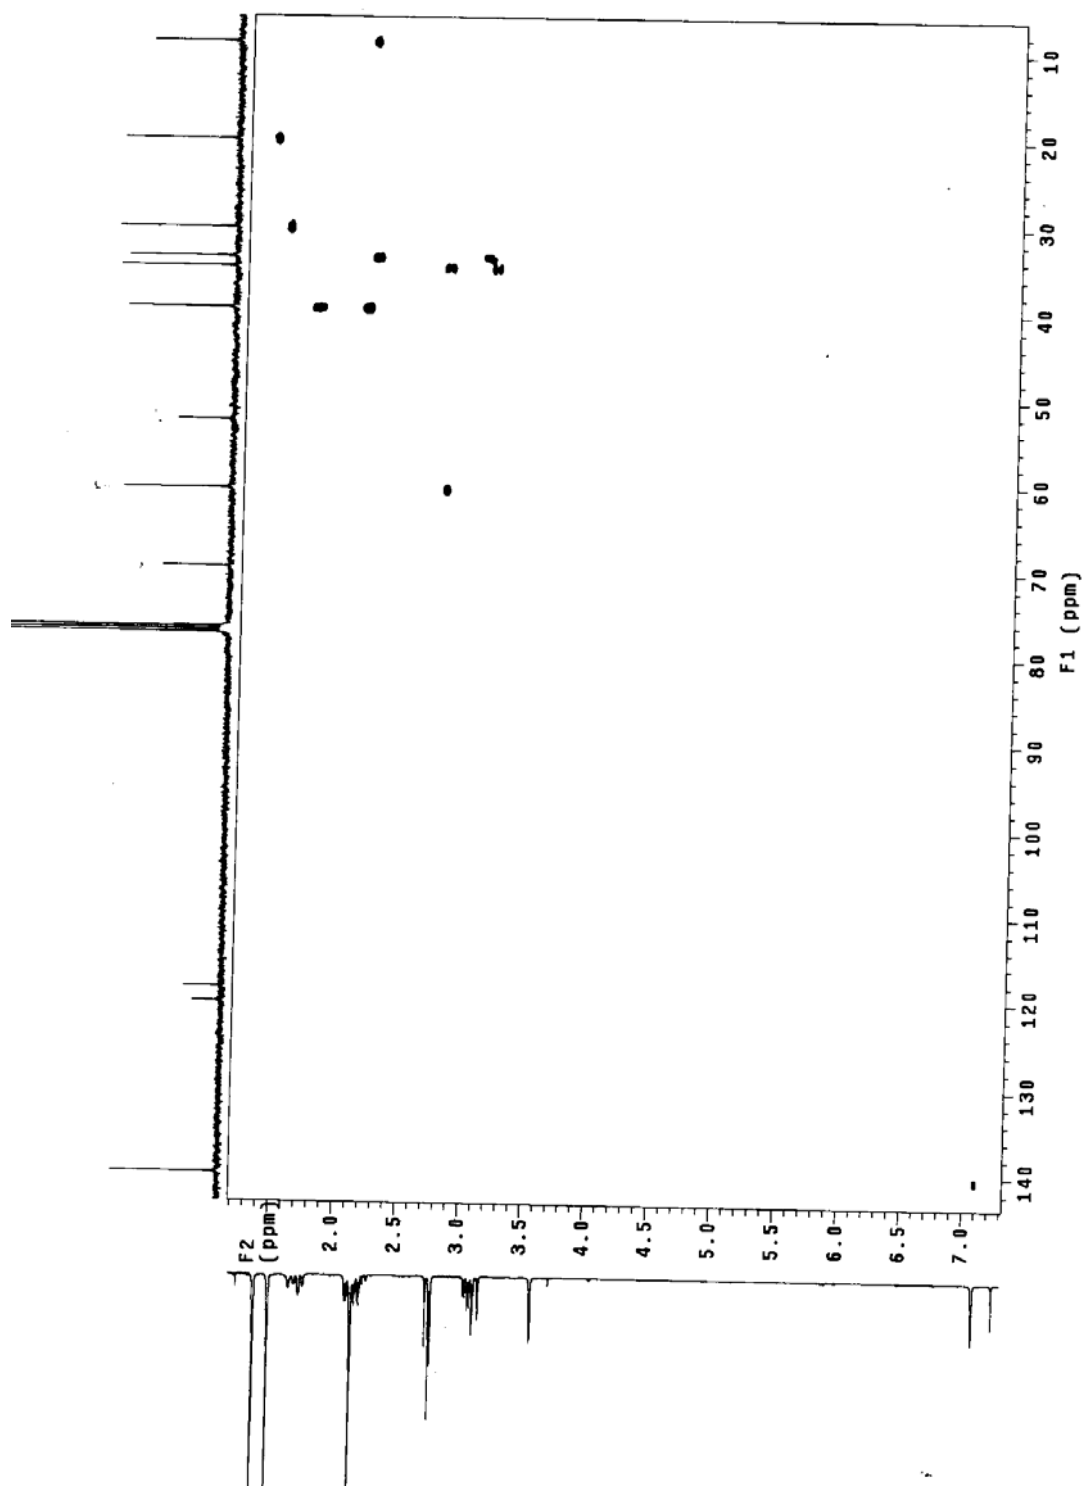

Figure S18.  $^1\text{H}$  NMR spectrum of Chlorantene **D** (**4**) in  $\text{CD}_3\text{COCD}_3$

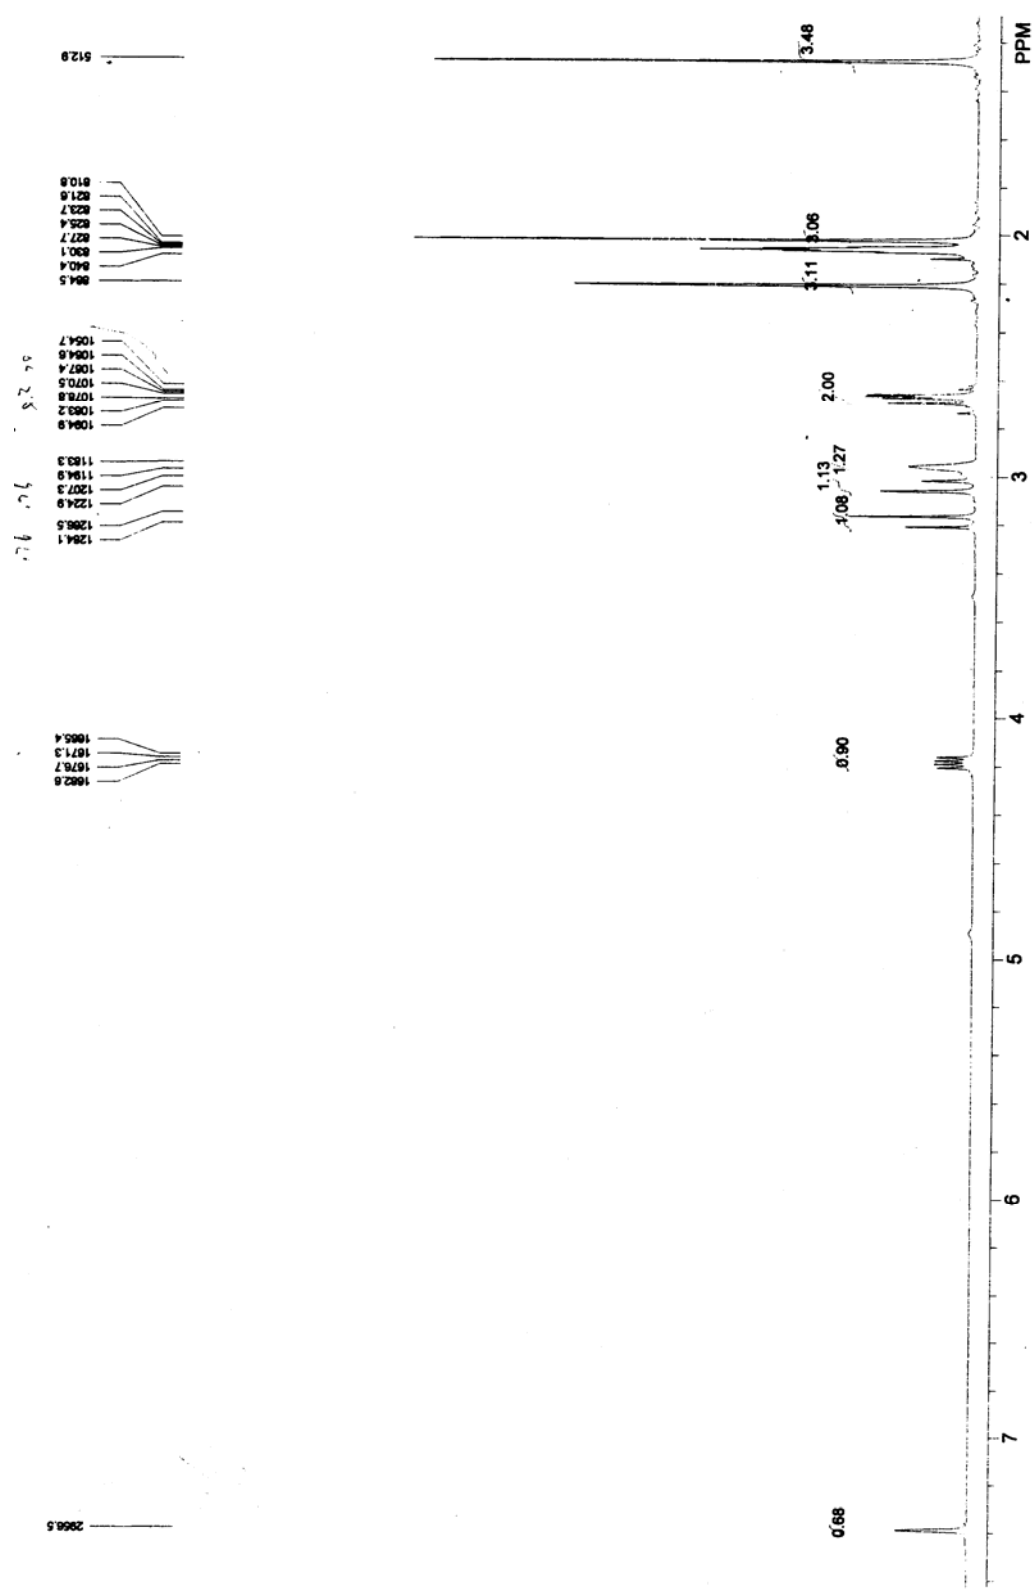

Figure S19.  $^{13}\text{C}$  NMR spectrum of Chlorantene **D** (4) in  $\text{CD}_3\text{COCD}_3$

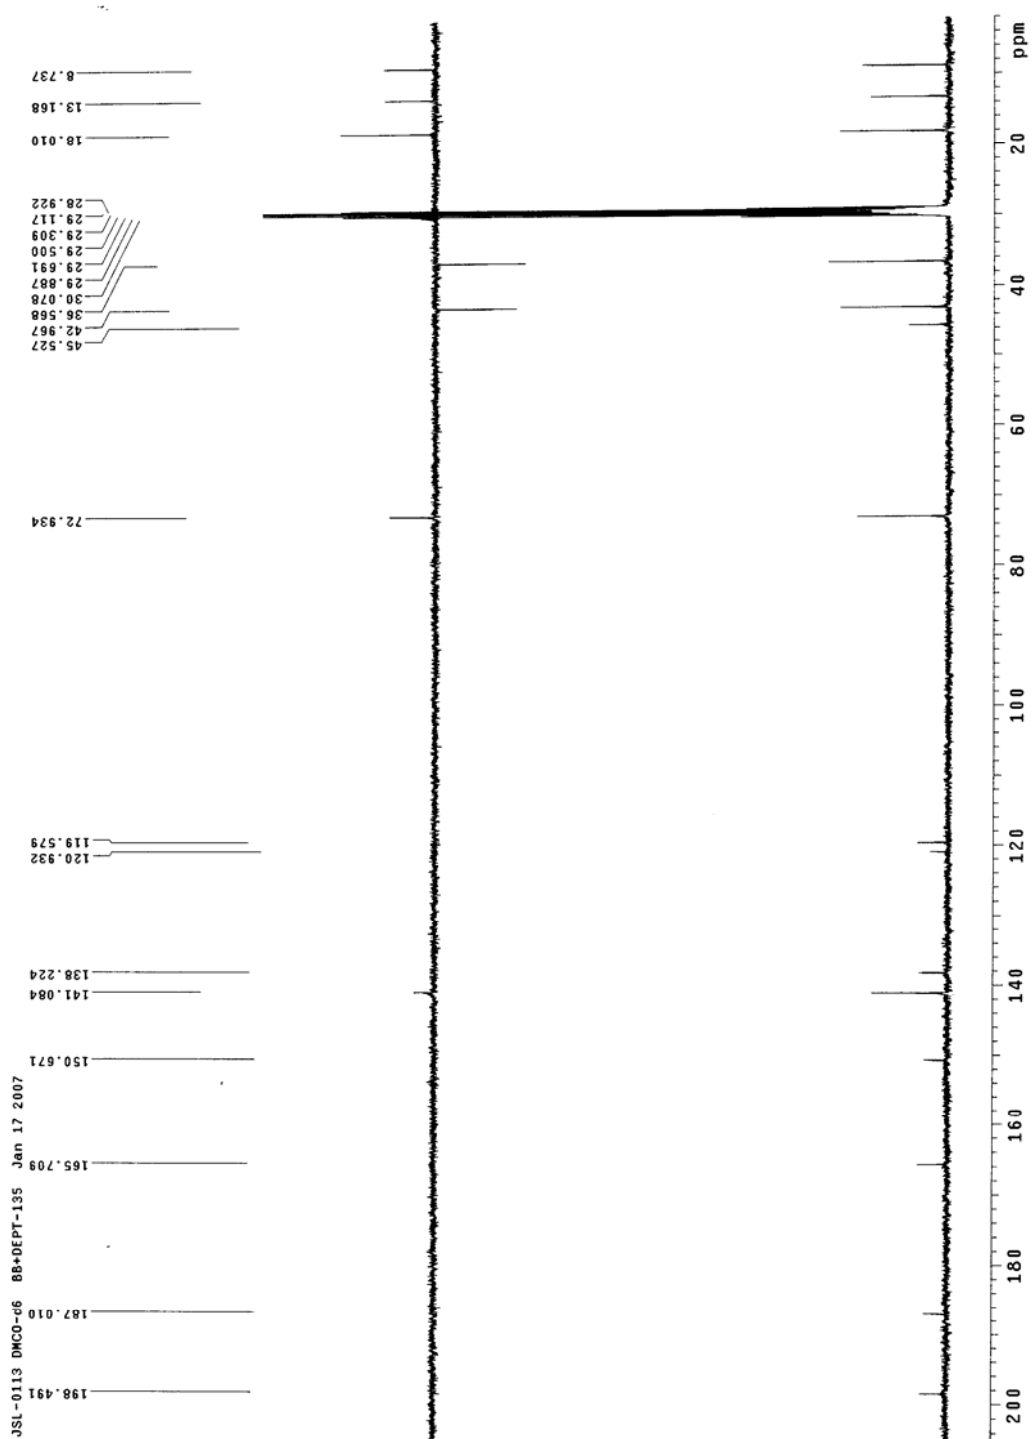



Figure S20. HSQC spectrum of Chlorantene **D** (**4**) in CD<sub>3</sub>COCD<sub>3</sub>

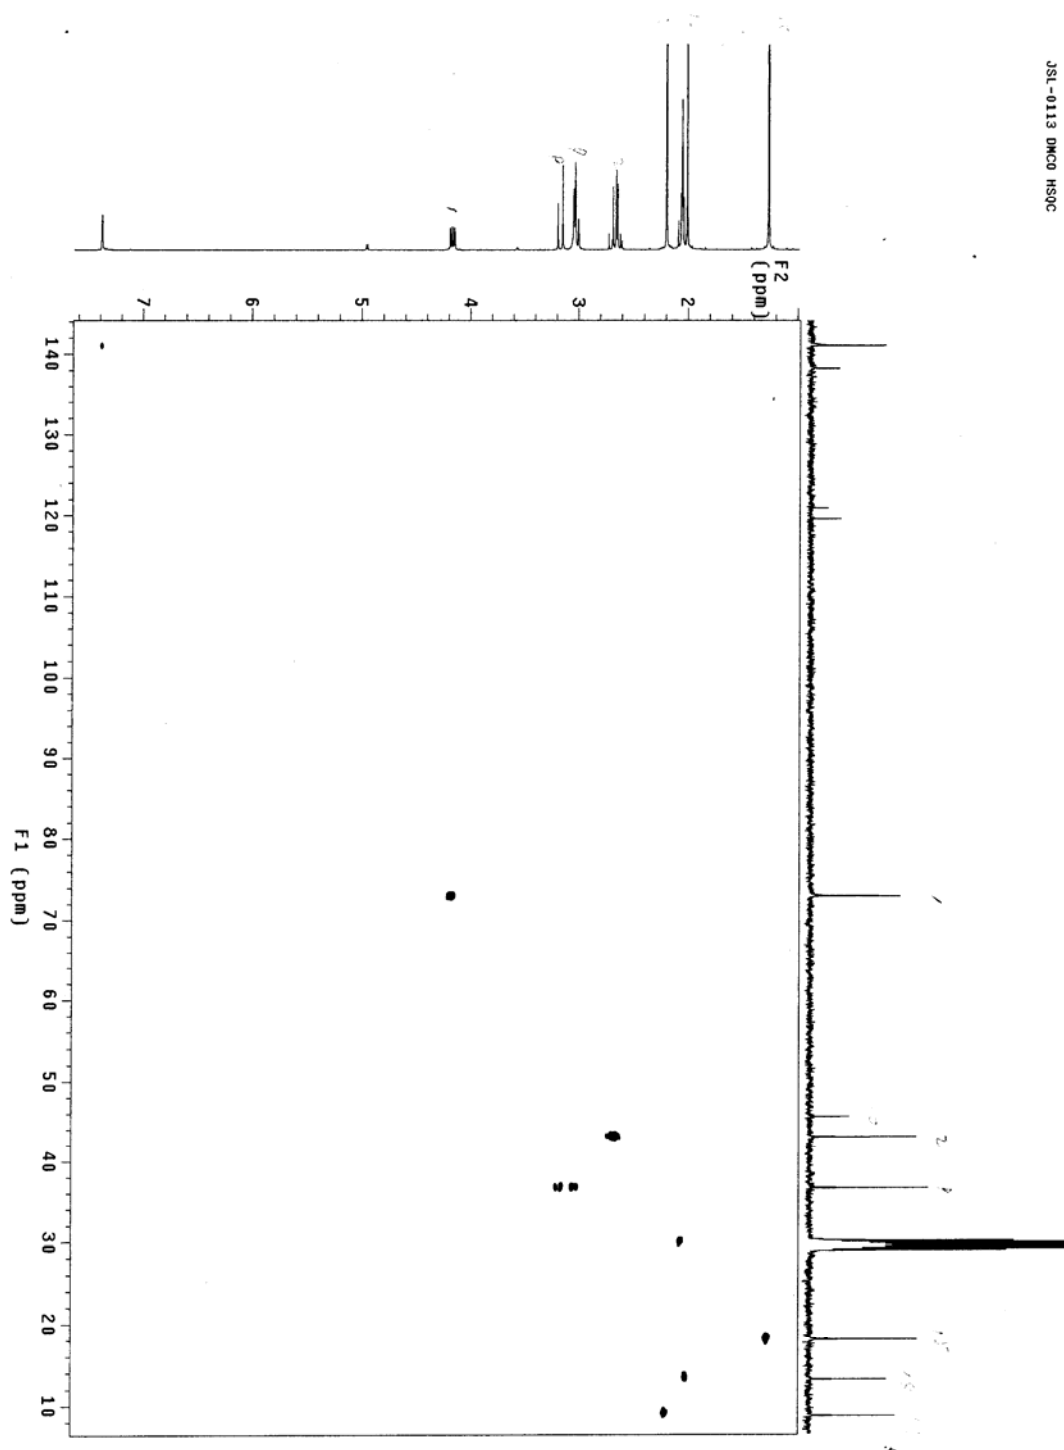

Figure S21.  $^1\text{H}$  NMR spectrum of Chlorantene **E** (**5**) in  $\text{CDCl}_3$

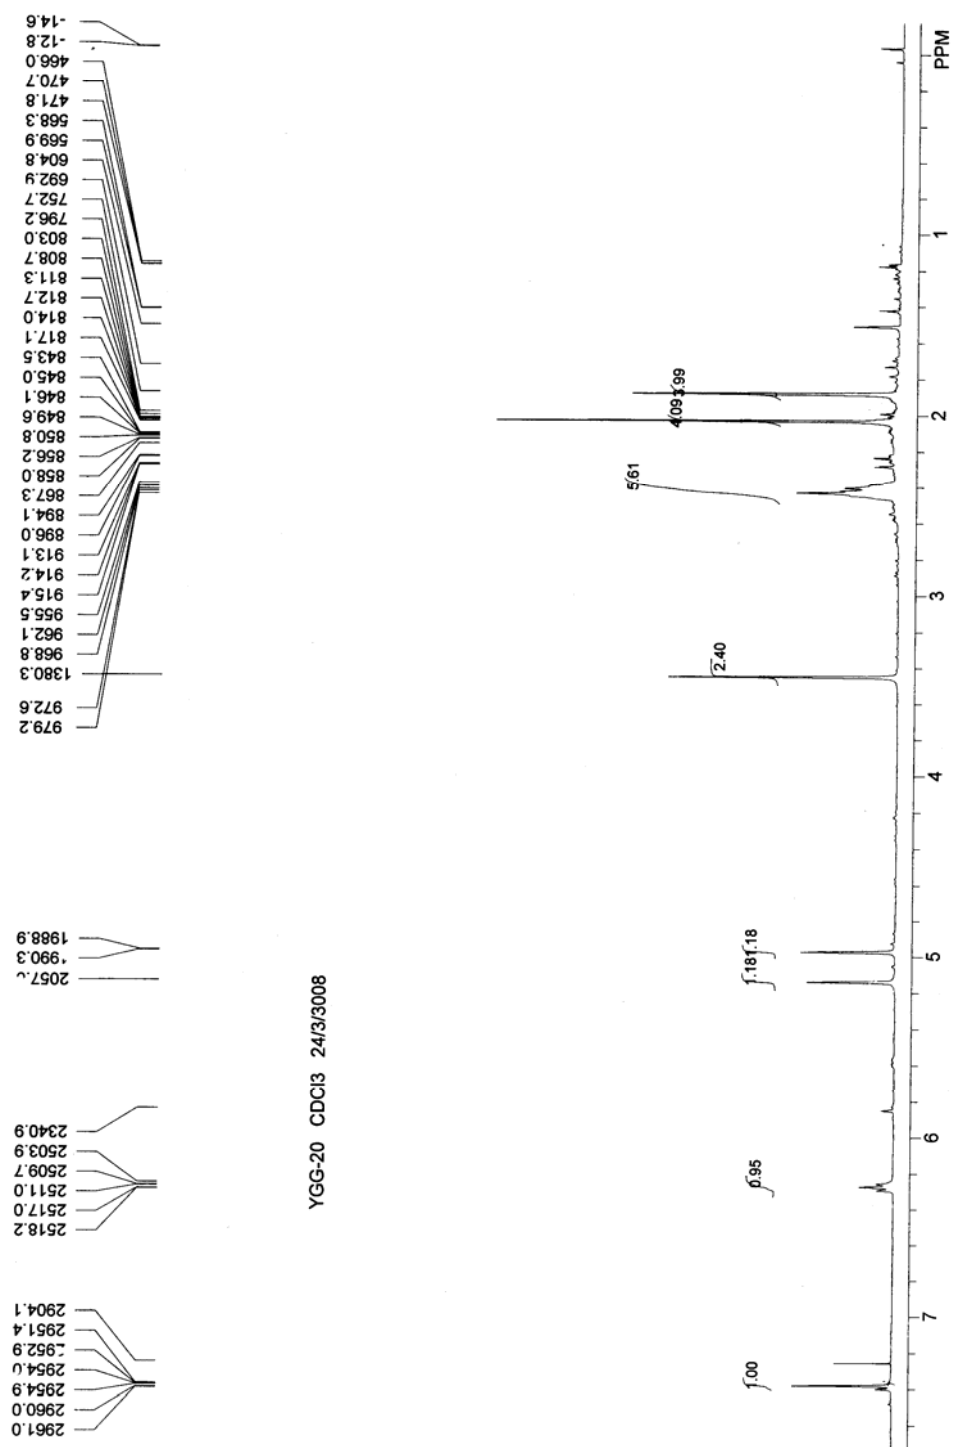

Figure S22.  $^{13}\text{C}$  NMR spectrum of Chlorantene **E** (**5**) in  $\text{CDCl}_3$

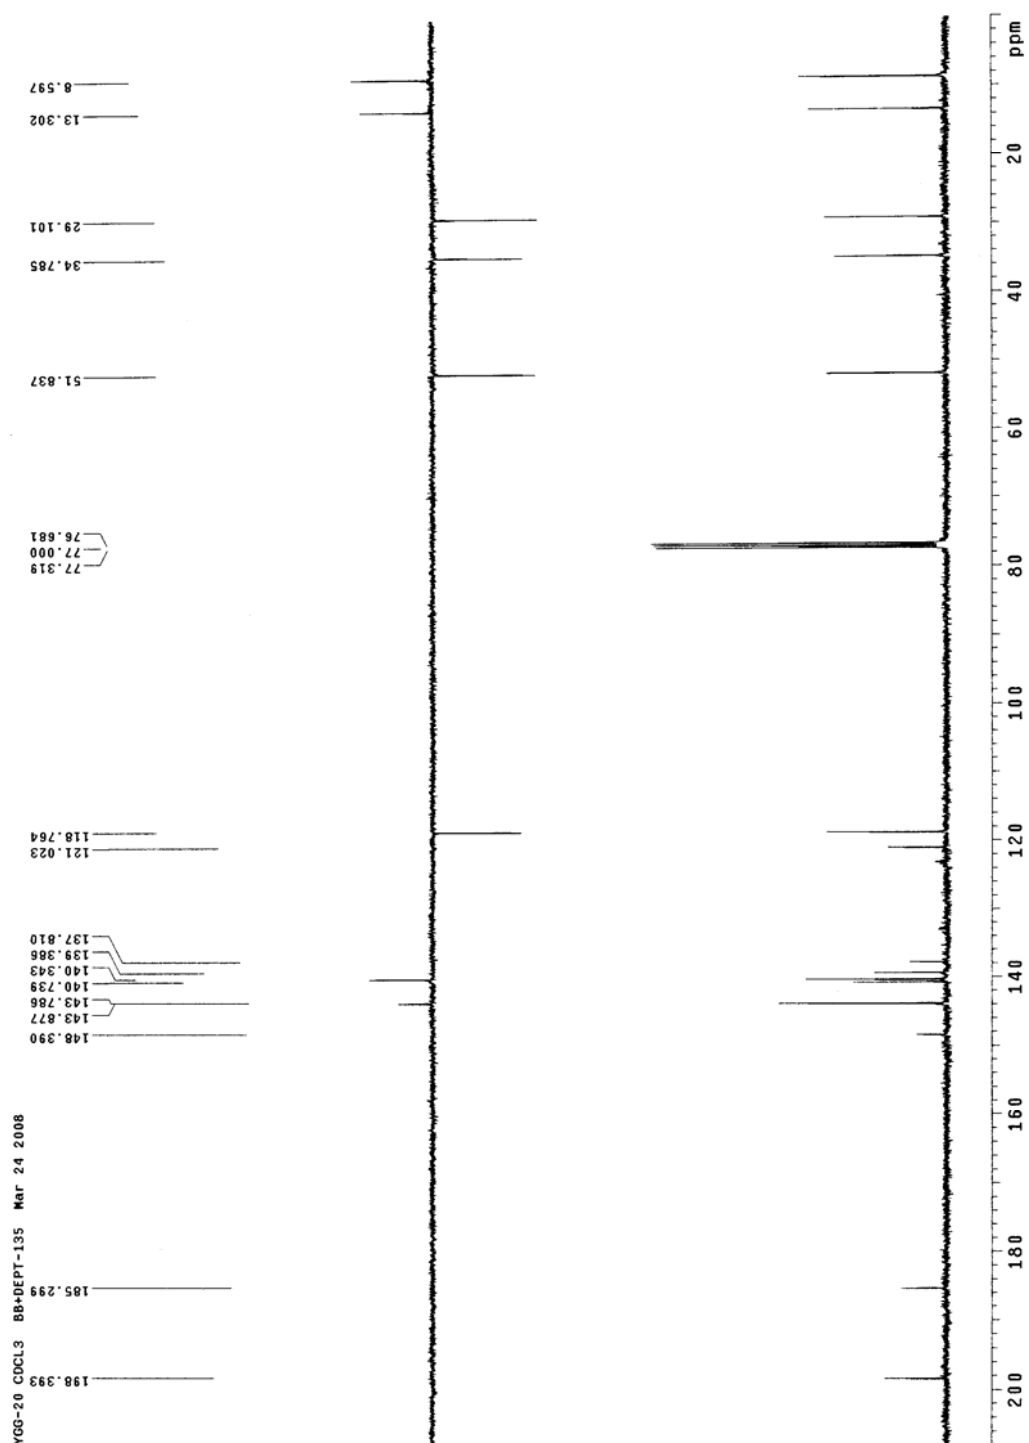

Figure S23.  $^1\text{H}$  NMR spectrum of Chlorantene **F** (**6**) in  $\text{CDCl}_3$

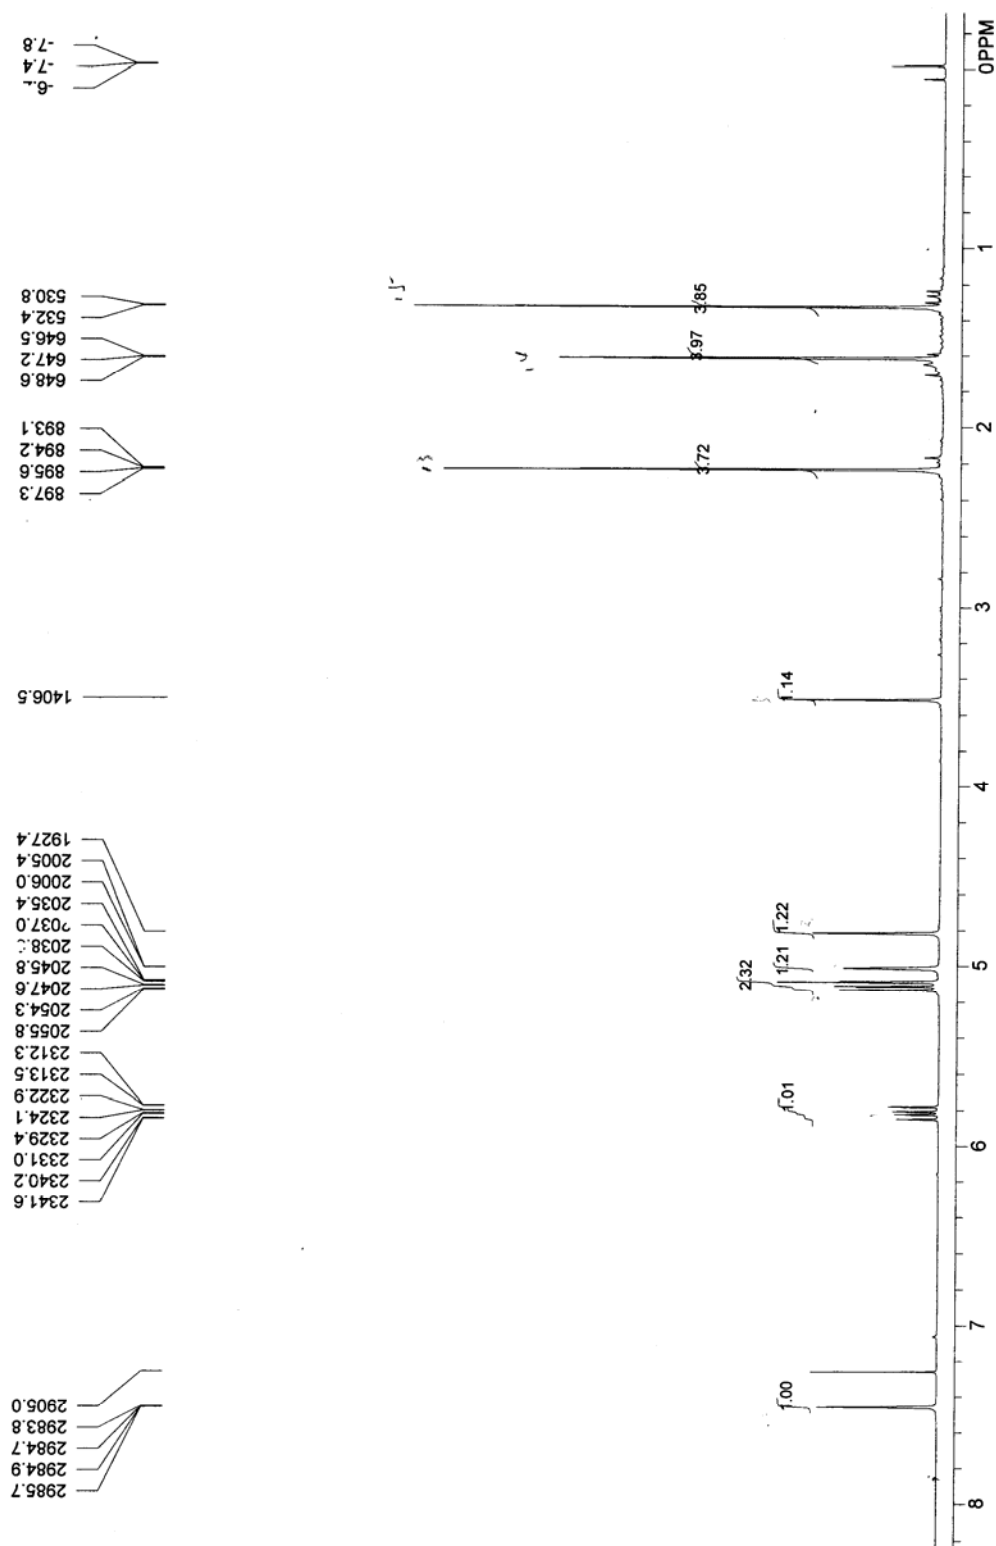

Figure S24.  $^{13}\text{C}$  NMR spectrum of Chlorantene **F** (6) in  $\text{CDCl}_3$

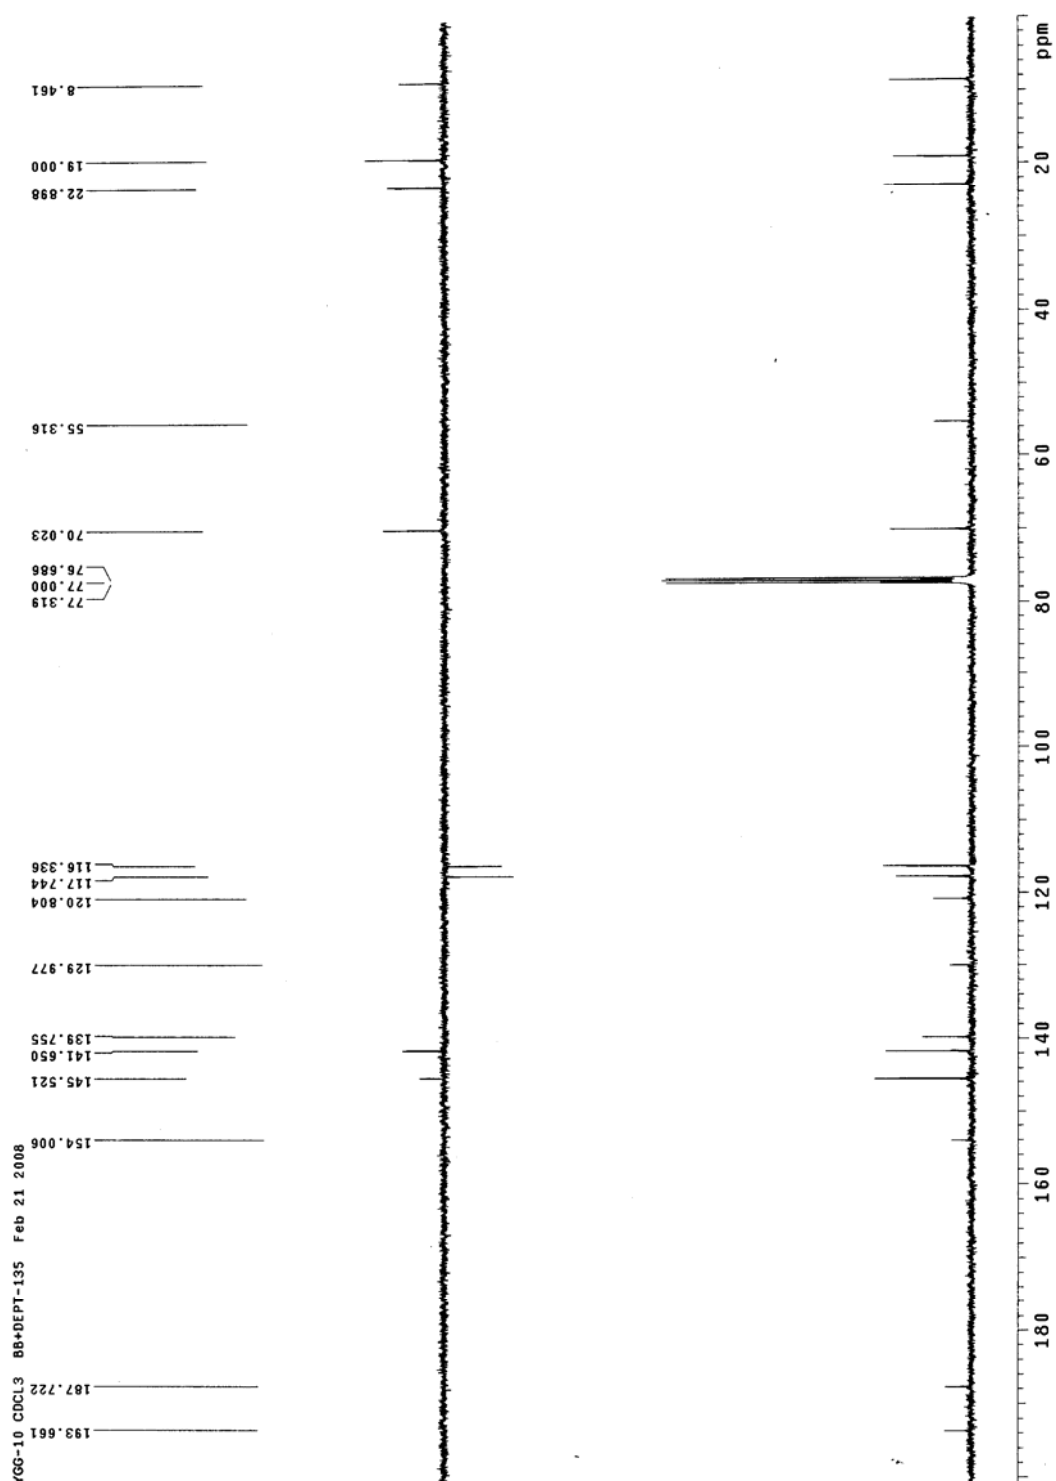

Figure S25.  $^1\text{H}$  NMR spectrum of Chlorantene **G** (**7**) in  $\text{CDCl}_3$

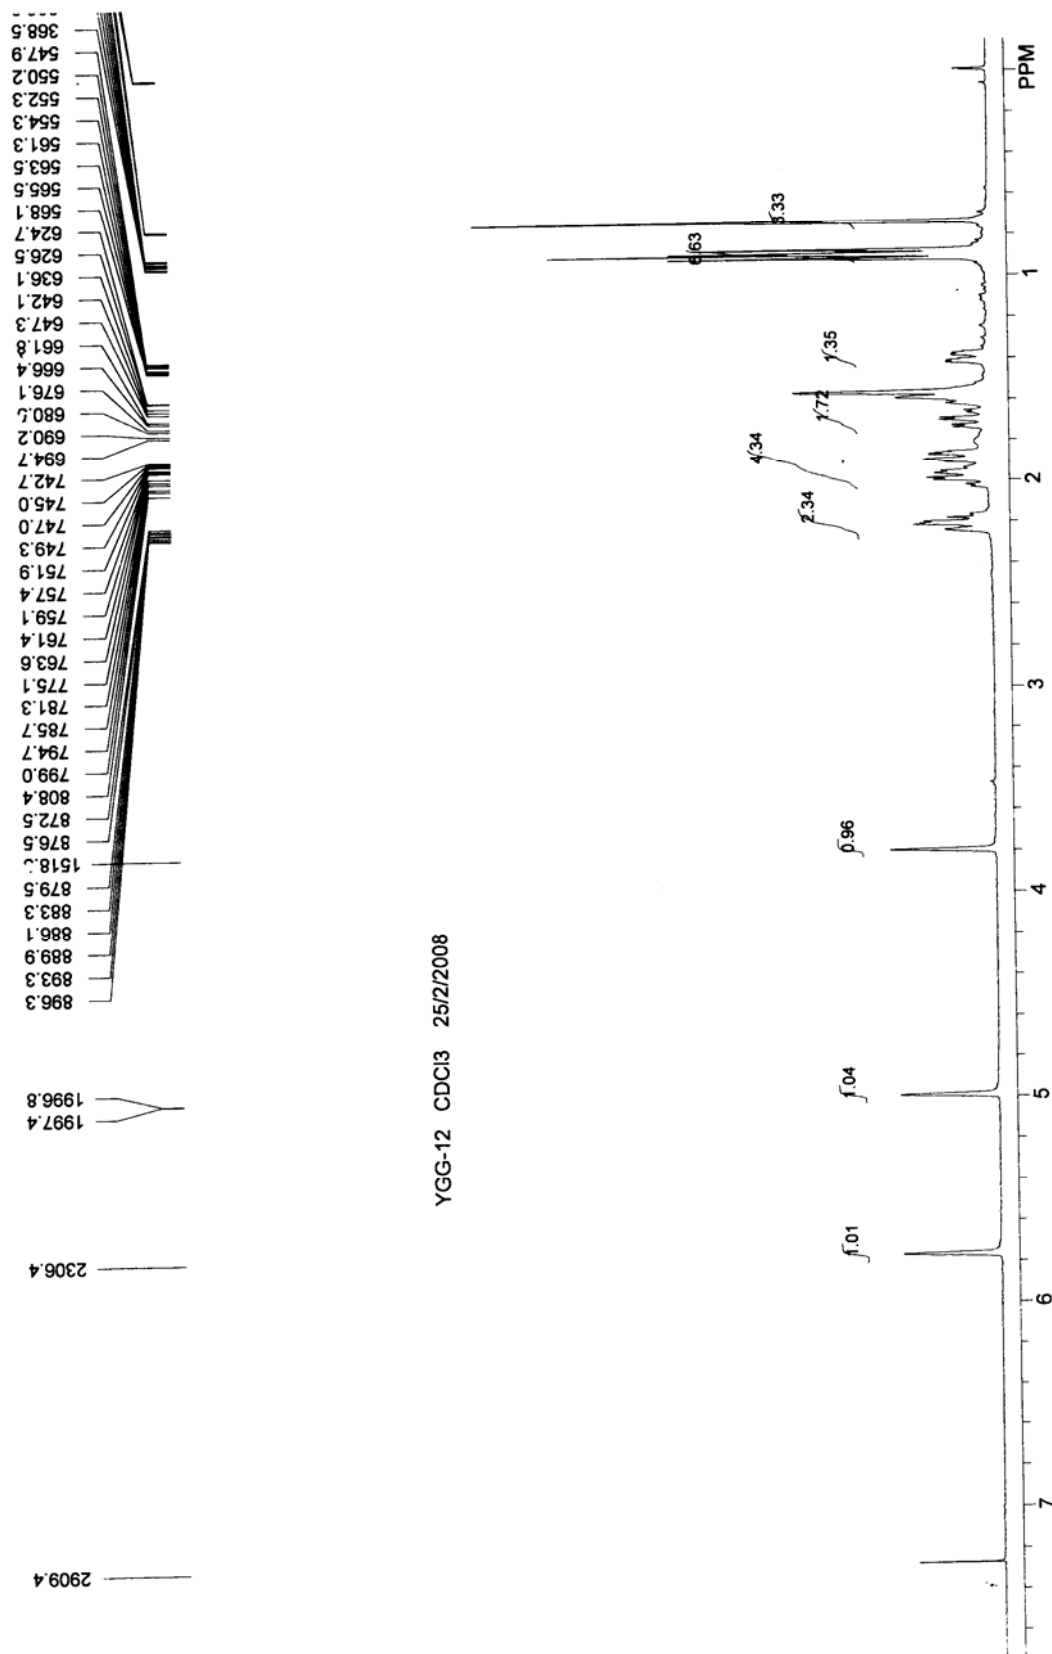

Figure S26.  $^{13}\text{C}$  NMR spectrum of Chlorantene **G** (**7**) in  $\text{CDCl}_3$

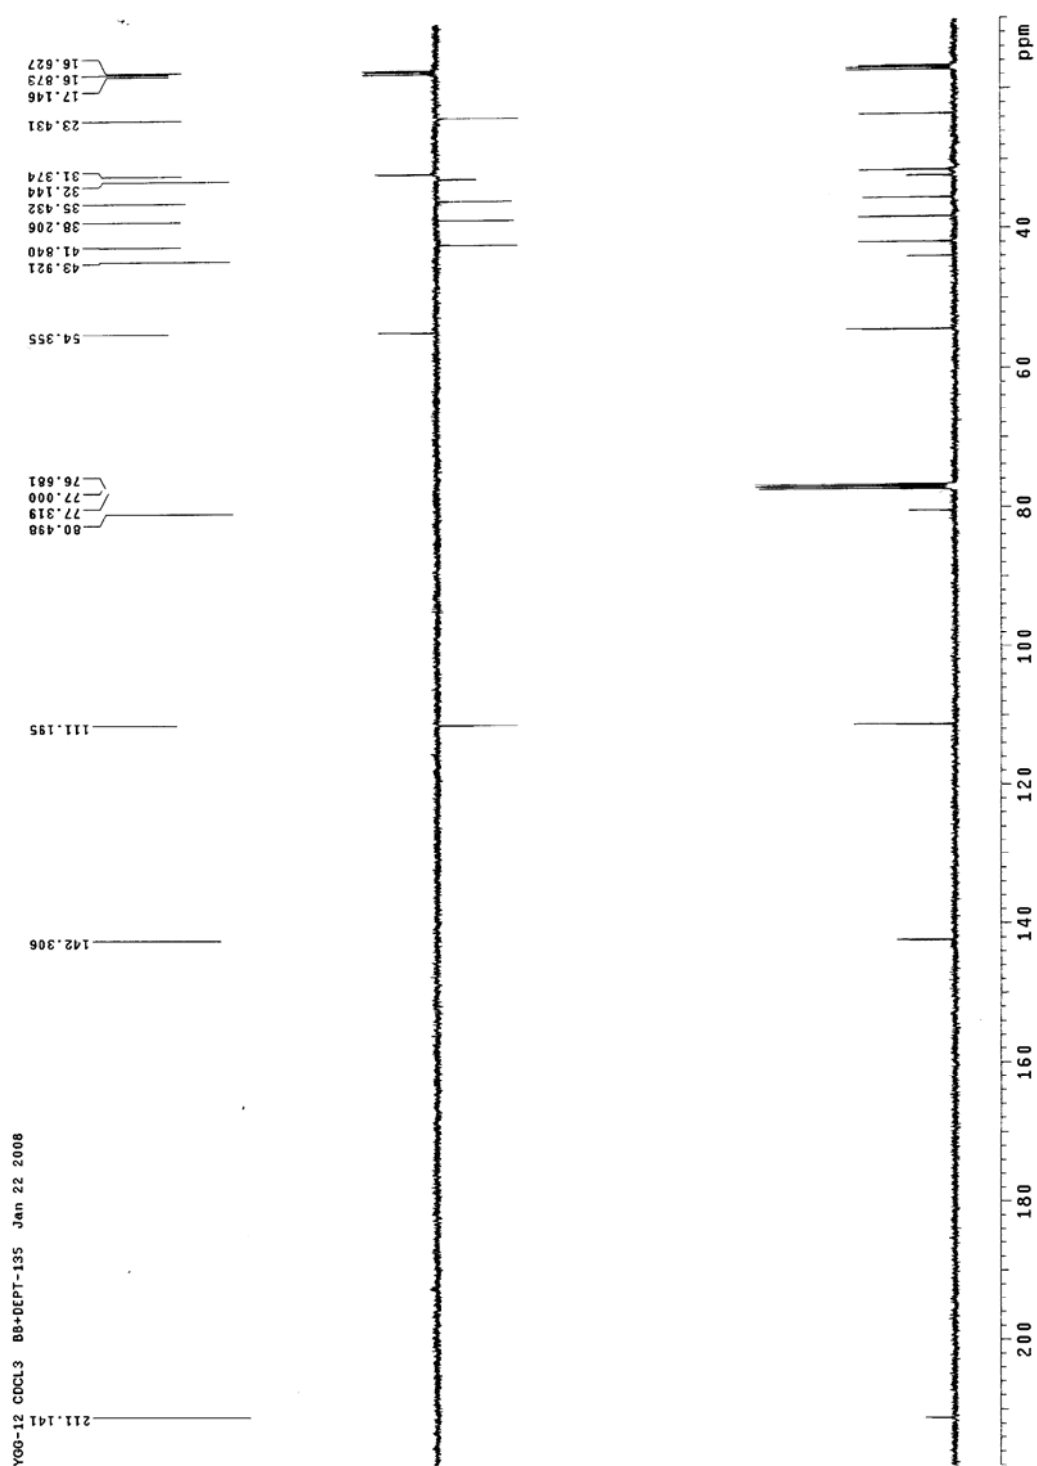

Figure S27. HSQC spectrum of Chlorantene **G** (7) in CDCl<sub>3</sub>

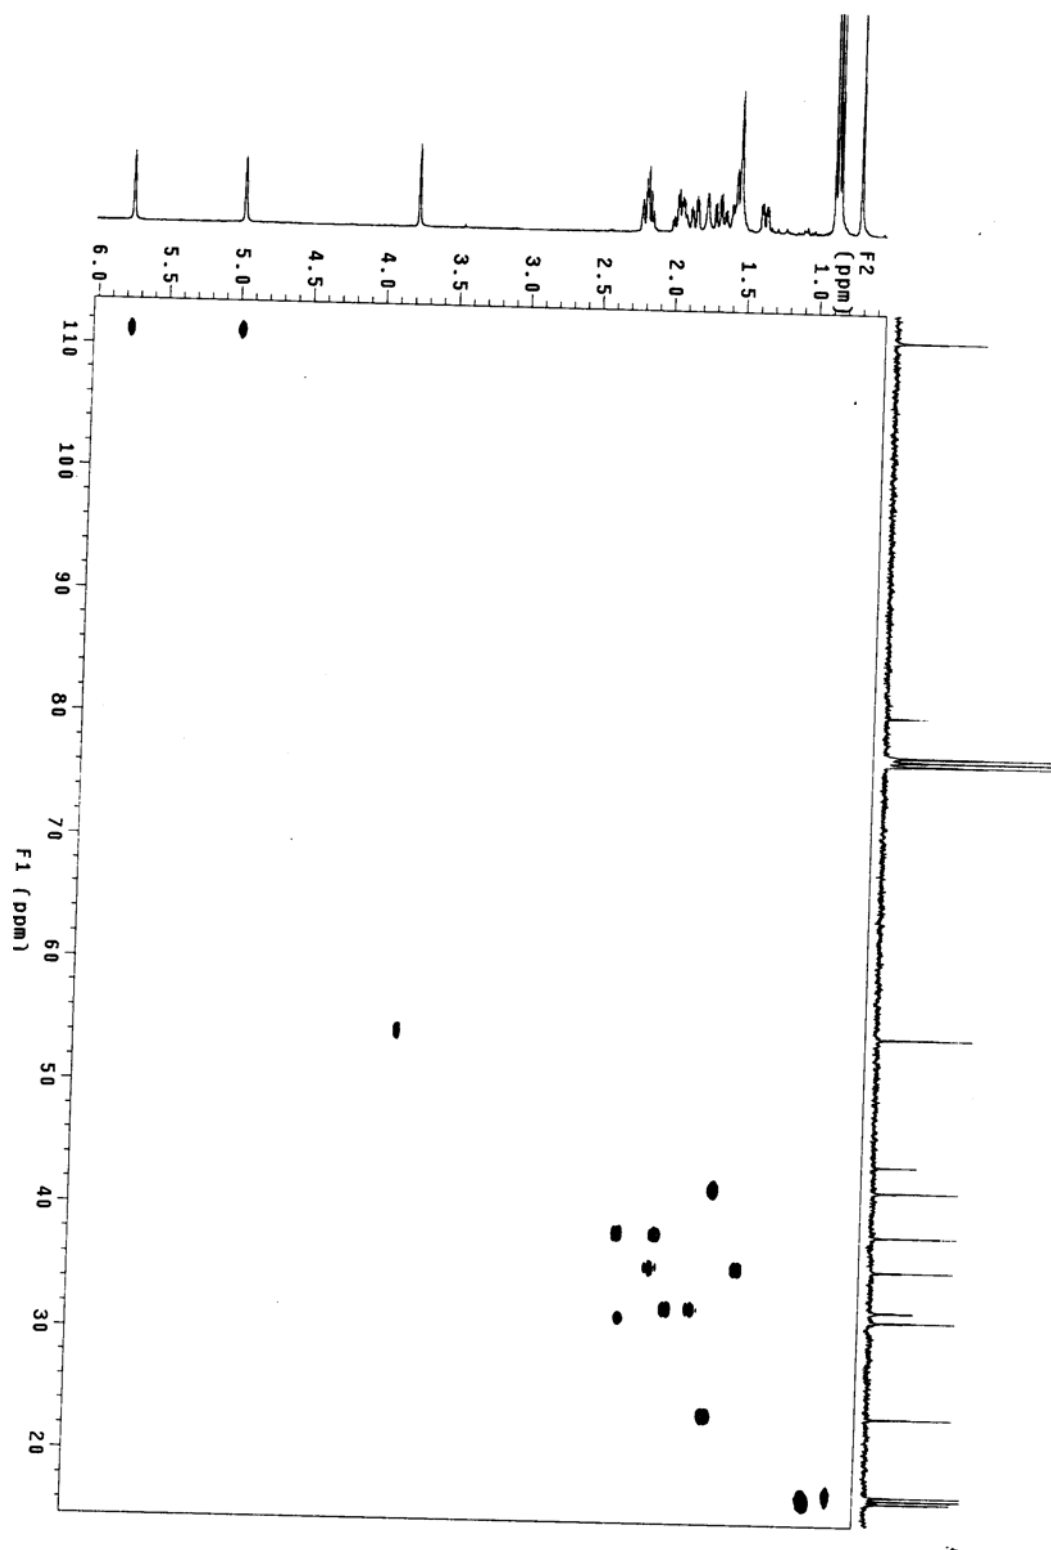



Figure S28.  $^1\text{H}$  NMR spectrum of compound **8** in  $\text{CDCl}_3$

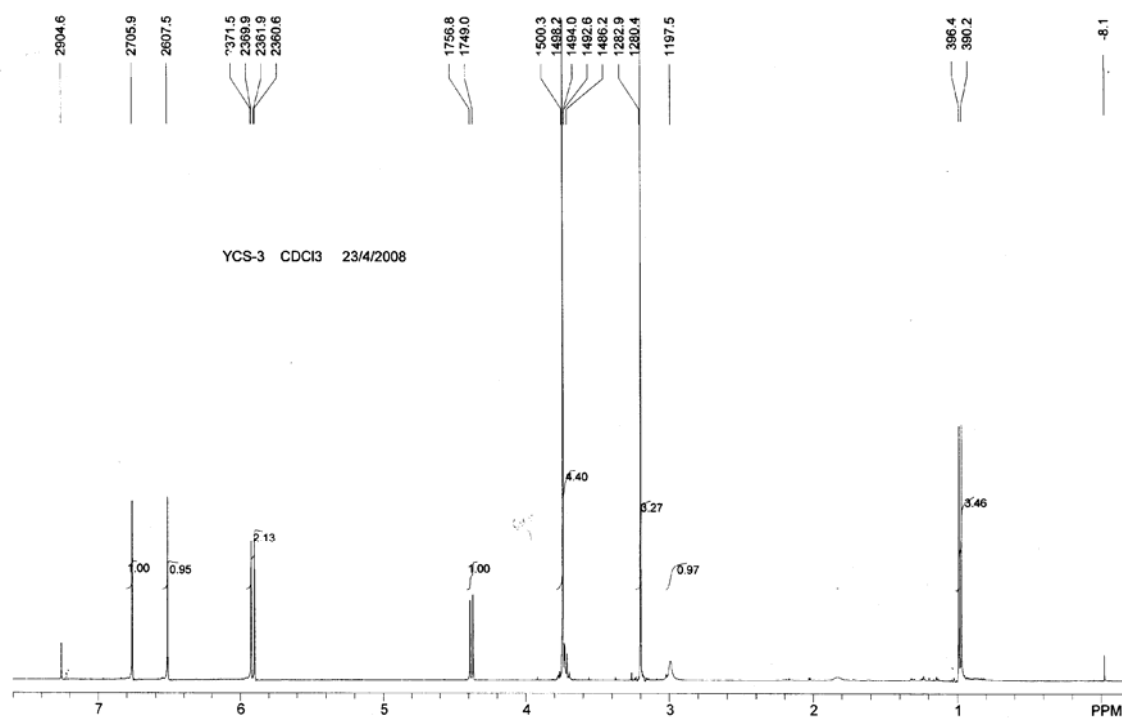

Figure S29.  $^1\text{H}$  NMR spectrum of compound **9** in  $\text{CDCl}_3$

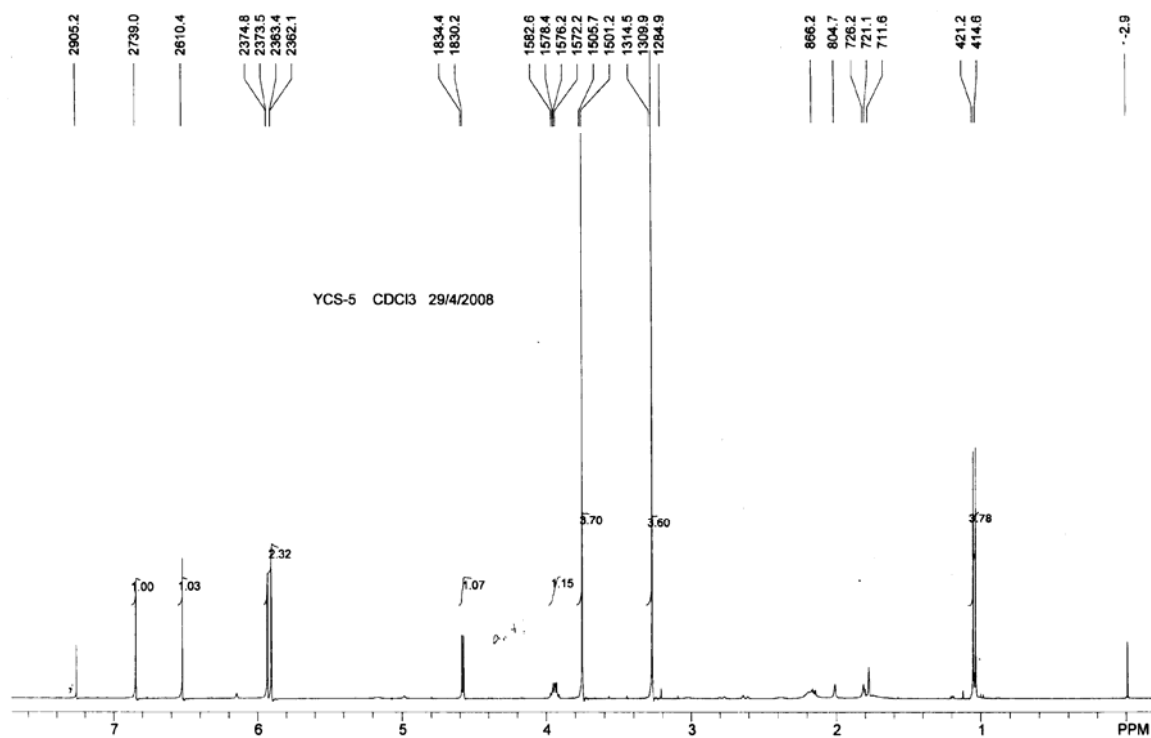

Figure S30.  $^{13}\text{C}$  NMR spectrum of compound **8** in  $\text{CDCl}_3$

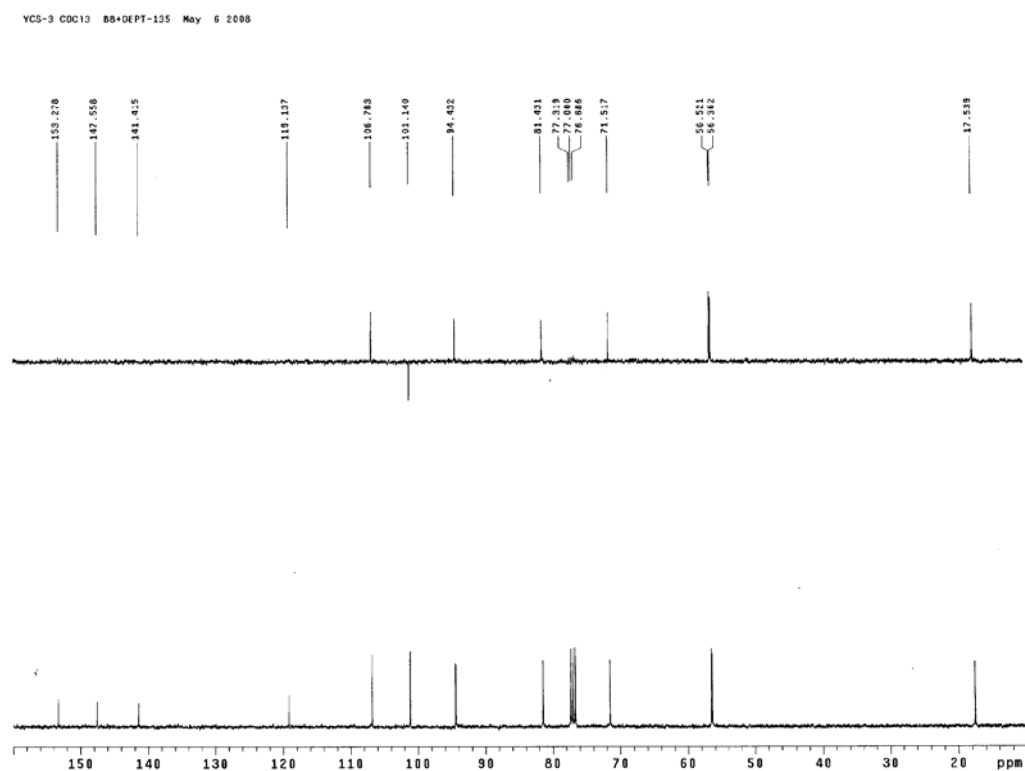

Figure S31.  $^{13}\text{C}$  NMR spectrum of compound **9** in  $\text{CDCl}_3$

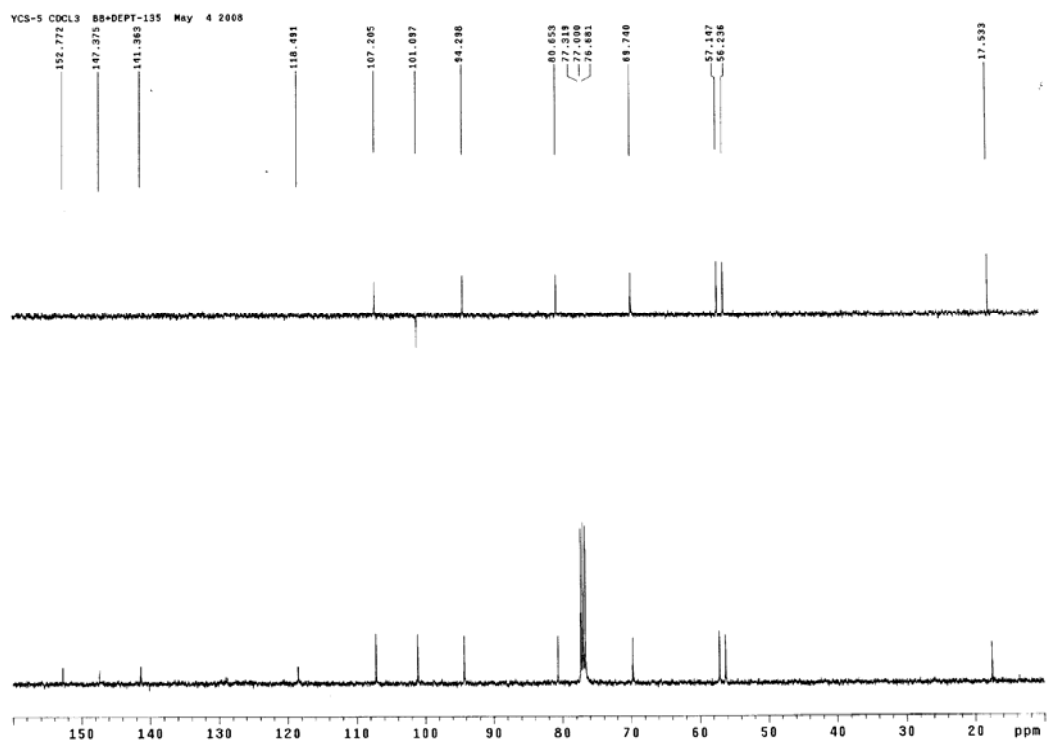

Supplement: Supplementary file 1 [file 4587682]
